# Supplementary material for: Therapeutic Efficiency of an External Chinese Herbal Formula of Mammary Precancerous Lesions by BATMAN-TCM Online Bioinformatics Analysis Tool and Experimental Validation
Source: Evid Based Complement Alternat Med. 2019 Feb 17;2019:2795010. doi: 10.1155/2019/2795010 (PMC6398062; doi:10.1155/2019/2795010)
Supplement: Supplementary Materials — Supplementary Tables 1: target prediction result for each ingredient. Supplementary Tables 2: all targets were intersected to obtain 182 main active sites. Supplementary Tables 3: bioinformatics analysis of potential targets. [file 2795010.f1.zip]

Archive with 3 entries (3 files):
- Supplementary table. S1.doc
- Supplementary table. S2.docx
- Supplementary table. S3.xlsx
