# Supplementary material for: Therapeutic Efficiency of an External Chinese Herbal Formula of Mammary Precancerous Lesions by BATMAN-TCM Online Bioinformatics Analysis Tool and Experimental Validation
Source: Evid Based Complement Alternat Med. 2019 Feb 17;2019:2795010. doi: 10.1155/2019/2795010 (PMC6398062; doi:10.1155/2019/2795010)
Supplement: Supplementary Materials — Supplementary Tables 1: target prediction result for each ingredient. Supplementary Tables 2: all targets were intersected to obtain 182 main active sites. Supplementary Tables 3: bioinformatics analysis of potential targets. [file 2795010.f1.zip › Supplementary table. S3.xlsx]

## Sheet: enrichmentAnalysis-KEGG
Category	HIE	KEGG pathway ID	Term description	ClusterNum	p-value	Adjusted p-value	Coverage	EnrichRatio	Target list mapped to this term	cluster1 sig
KEGG	3.3.7	hsa04080	Neuroactive ligand-receptor interaction	1	8.45e-40	1.97e-37	141	2.9	ADORA1;ADORA2A;ADORA2B;ADORA3;ADRA1A;ADRA1B;ADRA1D;ADRA2A;ADRA2B;ADRA2C;<br>ADRB1;ADRB2;ADRB3;AGTR1;AGTR2;AVPR1A;AVPR1B;AVPR2;BDKRB2;CHRM1;<br>CHRM2;CHRM3;CHRM4;CHRM5;CHRNA10;CHRNA2;CHRNA3;CHRNA4;CHRNA5;CHRNA6;<br>CHRNA7;CHRNA9;CHRNB2;CHRNB3;CHRNB4;CNR1;CNR2;CRHR1;CRHR2;CTSG;<br>DRD1;DRD2;DRD3;DRD4;DRD5;EDNRA;F2;F2R;F2RL1;GABBR1;<br>GABBR2;GABRA1;GABRA2;GABRA3;GABRA4;GABRA5;GABRA6;GABRB1;GABRB2;G…	1
KEGG	5.6	#	Nervous system	1	1.93e-27	2.25e-25	178	2.1	ABAT;ABL1;ACHE;ADRBK1;ALOX15;ALOX15B;ALOX5;ARRB2;BAX;BCL2;<br>BDNF;CACNA1A;CACNA1B;CACNA1C;CACNA1D;CACNA1F;CACNA1S;CALM1;CALM2;CALM3;<br>CALML3;CALY;CAMK2A;CAMK2D;CAMK2G;CDC42;CHAT;CHRM1;CHRM2;CHRM3;<br>CHRM4;CHRM5;CHRNA3;CHRNA4;CHRNA6;CHRNA7;CHRNB2;CHRNB4;CNR1;COMT;<br>CPLX2;CREBBP;CRH;CRHR1;DDC;DLG4;DNM3;DRD1;DRD2;DRD3;<br>DRD4;DRD5;EP300;FASLG;FOS;FOXO3;GABARAP;GABARAPL1;GABARAPL2;GABBR1;<br>G…	1
KEGG	5.2	#	Endocrine system	1	7.95e-25	6.17e-23	221	1.8	ACACA;ACACB;ACE;ACE2;ACSL1;ACSL3;ACSL4;ACTG1;ADIPOQ;AGT;<br>AGTR1;AGTR2;AKR1C3;ALOX5;ANAPC2;APOA1;APOA2;ATP1A1;ATP1A2;ATP1A3;<br>BMP4;BMP6;CACNA1C;CACNA1D;CACNA1F;CACNA1S;CACNA2D1;CACNA2D2;CACNB1;CACNB2;<br>CACNB3;CACNB4;CACNG1;CACNG2;CACNG3;CALM1;CALM2;CALM3;CALML3;CAMK2A;<br>CAMK2D;CAMK2G;CCNA2;CD36;CDC25B;CDC42;CDK2;CDKN1A;CHRM3;CREBBP;<br>CTNNB1;CTSG;CYP11A1;CYP17A1;CYP19A1;CYP1A1;CYP27A1;DCT…	1
KEGG	3.2.21	hsa04020	Calcium signaling pathway	1	4.97e-23	2.9e-21	88	2.8	ADORA2A;ADORA2B;ADRA1A;ADRA1B;ADRA1D;ADRB1;ADRB2;ADRB3;AGTR1;ATP2A1;<br>ATP2B4;AVPR1A;AVPR1B;BDKRB2;CACNA1A;CACNA1B;CACNA1C;CACNA1D;CACNA1F;CACNA1G;<br>CACNA1H;CACNA1S;CALM1;CALM2;CALM3;CALML3;CAMK2A;CAMK2D;CAMK2G;CHRM1;<br>CHRM2;CHRM3;CHRM5;CHRNA7;DRD1;DRD5;EDNRA;ERBB2;F2R;GNA15;<br>GRIN1;GRIN2A;GRIN2C;GRIN2D;HRH1;HRH2;HTR2A;HTR2B;HTR2C;HTR4;<br>HTR5A;HTR6;HTR7;ITPR1;ITPR2;ITPR3;LHCGR;NOS1;NOS2;…	1
KEGG	1.6	#	Amino acid metabolism	1	5.92e-20	2.76e-18	110	2.3	ABAT;ACADSB;ACMSD;ACY1;ACY3;ADH1A;ADH1B;ADH1C;ADH4;ADH7;<br>ADI1;ADSS;ADSSL1;AGXT;AGXT2;AHCY;AHCYL1;ALAS1;ALAS2;ALDH1A3;<br>ALDH1B1;ALDH2;ALDH3A1;ALDH3A2;ALDH3B1;ALDH3B2;ALDH5A1;ALDH7A1;AMT;AOC1;<br>AOC2;AOC3;APIP;ARG1;ARG2;ASMT;ASNS;ASPA;ASS1;BCAT1;<br>BCAT2;CAD;CAT;CDO1;CHDH;COMT;CYP1A1;DBH;DCT;DDC;<br>DMGDH;DNMT1;DNMT3A;DNMT3B;ENOPH1;FTCD;GAMT;GATM;GCAT;GCSH;<br>GLDC;GLUL;GLYAT;GNMT;GOT1;GOT2;…	1
KEGG	3.2	#	Signal transduction	1	6.55e-14	2.54e-12	357	1.4	ABL1;ACACA;ACACB;ACTG1;ACVR1;ACVR2A;ADAM17;ADIPOQ;ADORA1;ADORA2A;<br>ADORA2B;ADORA3;ADRA1A;ADRA1B;ADRA1D;ADRA2A;ADRA2B;ADRA2C;ADRB1;ADRB2;<br>ADRB3;AGTR1;ANGPT1;AREG;ARNT;ARRB1;ARRB2;ATM;ATP1A1;ATP1A2;<br>ATP1A3;ATP2A1;ATP2B4;AVPR1A;AVPR1B;BCAR1;BCL2;BCL2L1;BDKRB2;BDNF;<br>BMP2;BMP4;BMP5;BMP6;BNIP3;BRCA1;CACNA1A;CACNA1B;CACNA1C;CACNA1D;<br>CACNA1F;CACNA1G;CACNA1H;CACNA1S;CACNA2D1;CACNA2D2;CACNB1;…	1
KEGG	3.3	#	Signaling molecules and interaction	1	6.62e-13	2.2e-11	203	1.6	ACVR1;ACVR2A;ADORA1;ADORA2A;ADORA2B;ADORA3;ADRA1A;ADRA1B;ADRA1D;ADRA2A;<br>ADRA2B;ADRA2C;ADRB1;ADRB2;ADRB3;AGRN;AGTR1;AGTR2;AVPR1A;AVPR1B;<br>AVPR2;BDKRB2;BMP2;CCL5;CD34;CD36;CD47;CDH3;CDH5;CHRM1;<br>CHRM2;CHRM3;CHRM4;CHRM5;CHRNA10;CHRNA2;CHRNA3;CHRNA4;CHRNA5;CHRNA6;<br>CHRNA7;CHRNA9;CHRNB2;CHRNB3;CHRNB4;CLDN5;CNR1;CNR2;CNTF;CNTN2;<br>COL1A1;COL5A1;CRHR1;CRHR2;CSF1;CSF1R;CSF2;CTSG;CX3CR1;CXCL13;<…	1
KEGG	1.9	#	Metabolism of cofactors and vitamins	1	5.01e-12	1.46e-10	73	2.1	ACP1;ADH1A;ADH1B;ADH1C;ADH4;ADH7;ALAD;ALAS1;ALAS2;ALDH1A1;<br>ALDH1A2;ALDH1L1;AMT;ATIC;BCAT1;BCAT2;BLVRB;CYP1A1;CYP2B6;CYP3A4;<br>DHFR;DHFRL1;DHRS3;DHRS4;DHRS9;DPYD;DPYS;FECH;FPGS;FTCD;<br>GART;GGCX;GGH;HLCS;HMOX1;HSD17B6;LRAT;MMAB;MTFMT;MTHFD1;<br>MTHFD2;MTHFR;MTR;NAMPT;NAPRT;NFS1;NNMT;NQO1;NT5C1A;NT5E;<br>NT5M;NUDT12;PDXK;PDXP;PNP;QDPR;QPRT;RDH10;RDH11;RDH12;<br>RDH5;RDH8;RETSAT;RFK;SHMT1;SHMT2…	1
KEGG	5.6.5	hsa04726	Serotonergic synapse	1	6.69e-11	1.73e-09	49	2.5	ALOX15;ALOX15B;ALOX5;CACNA1A;CACNA1B;CACNA1C;CACNA1D;CACNA1F;CACNA1S;DDC;<br>GABRB1;GABRB2;GABRB3;GNB5;HTR1A;HTR1B;HTR1D;HTR1E;HTR1F;HTR2A;<br>HTR2B;HTR2C;HTR3A;HTR3B;HTR3C;HTR3D;HTR3E;HTR4;HTR5A;HTR6;<br>HTR7;ITPR1;ITPR2;ITPR3;KCND2;KCNJ3;KCNJ5;KCNJ6;KCNJ9;KCNN2;<br>MAOA;MAOB;PTGS1;PTGS2;SLC18A1;SLC18A2;SLC6A4;TPH1;TPH2;|	1
KEGG	1.6.10	hsa00350	Tyrosine metabolism	1	9.65e-11	2.25e-09	25	3.7	ADH1A;ADH1B;ADH1C;ADH4;ADH7;ALDH1A3;ALDH3A1;ALDH3B1;ALDH3B2;AOC2;<br>AOC3;COMT;DBH;DCT;DDC;GOT1;GOT2;MAOA;MAOB;MIF;<br>TAT;TH;TPO;TYR;TYRP1;|	1
KEGG	3.2.23	hsa04022	cGMP - PKG signaling pathway	1	5.23e-10	1.11e-08	62	2.1	ADORA1;ADORA3;ADRA1A;ADRA1B;ADRA1D;ADRA2A;ADRA2B;ADRA2C;ADRB1;ADRB2;<br>ADRB3;AGTR1;ATP1A1;ATP1A2;ATP1A3;ATP2A1;ATP2B4;BDKRB2;CACNA1C;CACNA1D;<br>CACNA1F;CACNA1S;CALM1;CALM2;CALM3;CALML3;EDNRA;GUCY1B3;INS;INSR;<br>ITPR1;ITPR2;ITPR3;KCNJ8;KCNMA1;KCNMB1;KCNMB2;KCNMB3;KCNMB4;MEF2C;<br>NOS3;NPR1;NPR2;OPRD1;PDE2A;PDE3A;PDE3B;PDE5A;PLN;PPP1CA;<br>PPP1CC;PPP3CA;PPP3CB;PPP3R1;RGS2;RHOA;ROCK1;ROCK2;SLC8A1…	1
KEGG	5.2.10	hsa04921	Oxytocin signaling pathway	1	1.42e-09	2.76e-08	59	2.1	ACTG1;CACNA1C;CACNA1D;CACNA1F;CACNA1S;CACNA2D1;CACNA2D2;CACNB1;CACNB2;CACNB3;<br>CACNB4;CACNG1;CACNG2;CACNG3;CALM1;CALM2;CALM3;CALML3;CAMK2A;CAMK2D;<br>CAMK2G;CDKN1A;FOS;GUCY1B3;ITPR1;ITPR2;ITPR3;KCNJ3;KCNJ5;KCNJ6;<br>KCNJ9;MAP2K5;MEF2C;NOS3;NPR1;NPR2;OXT;OXTR;PPP1CA;PPP1CC;<br>PPP3CA;PPP3CB;PPP3R1;PRKAA1;PRKAA2;PRKAB1;PRKAB2;PRKAG1;PRKAG2;PRKAG3;<br>PTGS2;RGS2;RHOA;ROCK1;ROCK2;RYR1;RYR2;RYR3;SRC…	1
KEGG	5.3	#	Circulatory system	1	1.85e-09	3.08e-08	84	1.9	ADORA2A;ADORA2B;ADRA1A;ADRA1B;ADRA1D;ADRB1;ADRB2;AGTR1;AGTR2;ATP1A1;<br>ATP1A2;ATP1A3;ATP2B4;AVPR1A;AVPR1B;BCL2;CACNA1C;CACNA1D;CACNA1F;CACNA1S;<br>CACNA2D1;CACNA2D2;CACNB1;CACNB2;CACNB3;CACNB4;CACNG1;CACNG2;CACNG3;CALM1;<br>CALM2;CALM3;CALML3;CAMK2A;CAMK2D;CAMK2G;COX1;COX2;COX3;COX4I1;<br>COX5A;COX5B;COX6A2;COX6B1;COX6C;COX7A1;COX7B;COX7C;COX8A;EDNRA;<br>GUCY1B3;ITPR1;ITPR2;ITPR3;KCNMA1;KCNMB1;K…	1
KEGG	1.6.11	hsa00360	Phenylalanine metabolism	1	1.75e-09	3.08e-08	15	4.8	ALDH1A3;ALDH3A1;ALDH3B1;ALDH3B2;AOC2;AOC3;DDC;GLYAT;GOT1;GOT2;<br>MAOA;MAOB;MIF;PAH;TAT;|	1
KEGG	5.6.2	hsa04727	GABAergic synapse	1	4.23e-09	6.57e-08	39	2.6	ABAT;CACNA1A;CACNA1B;CACNA1C;CACNA1D;CACNA1F;CACNA1S;GABARAP;GABARAPL1;GABARAPL2;<br>GABBR1;GABBR2;GABRA1;GABRA2;GABRA3;GABRA4;GABRA5;GABRA6;GABRB1;GABRB2;<br>GABRB3;GABRD;GABRE;GABRG1;GABRG2;GABRG3;GABRP;GABRQ;GABRR1;GABRR2;<br>GABRR3;GLUL;GNB5;HAP1;KCNJ6;SLC12A5;SLC32A1;SLC38A3;SRC;|	1
KEGG	5.6.4	hsa04728	Dopaminergic synapse	1	6.52e-09	9.49e-08	50	2.2	ARRB2;CACNA1A;CACNA1B;CACNA1C;CACNA1D;CALM1;CALM2;CALM3;CALML3;CALY;<br>CAMK2A;CAMK2D;CAMK2G;COMT;DDC;DRD1;DRD2;DRD3;DRD4;DRD5;<br>FOS;GNB5;GRIA1;GRIA2;GRIA3;GRIA4;GRIN2A;GRIN2B;GSK3A;ITPR1;<br>ITPR2;ITPR3;KCNJ3;KCNJ5;KCNJ6;KCNJ9;MAOA;MAOB;PPP1CA;PPP1CC;<br>PPP1R1B;PPP2CA;PPP2CB;PPP3CA;PPP3CB;SCN1A;SLC18A1;SLC18A2;SLC6A3;TH;<br>|	1
KEGG	1.9.9	hsa00670	One carbon pool by folate	1	7e-09	9.59e-08	15	4.5	ALDH1L1;AMT;ATIC;DHFR;DHFRL1;FTCD;GART;MTFMT;MTHFD1;MTHFD2;<br>MTHFR;MTR;SHMT1;SHMT2;TYMS;|	1
KEGG	5.3.1	hsa04260	Cardiac muscle contraction	1	3.33e-08	4.31e-07	34	2.6	ATP1A1;ATP1A2;ATP1A3;CACNA1C;CACNA1D;CACNA1F;CACNA1S;CACNA2D1;CACNA2D2;CACNB1;<br>CACNB2;CACNB3;CACNB4;CACNG1;CACNG2;CACNG3;COX1;COX2;COX3;COX4I1;<br>COX5A;COX5B;COX6A2;COX6B1;COX6C;COX7A1;COX7B;COX7C;COX8A;RYR2;<br>SLC8A1;SLC9A6;TNNC1;TPM1;|	1
KEGG	5.6.8	hsa04723	Retrograde endocannabinoid signaling	1	3.55e-08	4.35e-07	41	2.3	CACNA1A;CACNA1B;CACNA1C;CACNA1D;CACNA1F;CACNA1S;CNR1;GABRA1;GABRA2;GABRA3;<br>GABRA4;GABRA5;GABRA6;GABRB1;GABRB2;GABRB3;GABRD;GABRE;GABRG1;GABRG2;<br>GABRG3;GABRP;GABRQ;GABRR1;GABRR2;GABRR3;GNB5;GRIA1;GRIA2;GRIA3;<br>GRIA4;ITPR1;ITPR2;ITPR3;KCNJ3;KCNJ5;KCNJ6;KCNJ9;PTGS2;SLC17A7;<br>SLC32A1;|	1
KEGG	1.6.2	hsa00260	Glycine, serine and threonine metabolism	1	2.35e-07	2.74e-06	21	3.1	AGXT;AGXT2;ALAS1;ALAS2;ALDH7A1;AMT;AOC2;AOC3;CHDH;DMGDH;<br>GAMT;GATM;GCAT;GCSH;GLDC;GNMT;MAOA;MAOB;PIPOX;SHMT1;<br>SHMT2;|	1
KEGG	5.9	#	Environmental adaptation	1	3.54e-07	3.93e-06	44	2.1	CACNA1C;CACNA1D;CACNA1G;CACNA1H;CALM1;CALM2;CALM3;CALML3;CAMK2A;CAMK2D;<br>CAMK2G;FOS;GNB5;GRIA1;GRIA2;GRIA3;GRIA4;GRIN1;GRIN2A;GRIN2B;<br>GRIN2C;GRIN2D;GUCY1B3;ITPR1;ITPR3;KCNJ3;KCNJ5;KCNJ6;KCNJ9;MTNR1A;<br>MTNR1B;NOS1;NOS1AP;NR1D1;PRKAA1;PRKAA2;PRKAB1;PRKAB2;PRKAG1;PRKAG2;<br>PRKAG3;RYR1;RYR2;RYR3;|	1
KEGG	1.4.9	hsa00140	Steroid hormone biosynthesis	1	6.41e-07	6.79e-06	26	2.6	AKR1C1;AKR1C2;AKR1C3;AKR1C4;AKR1D1;COMT;CYP11A1;CYP11B1;CYP11B2;CYP17A1;<br>CYP19A1;CYP1A1;CYP21A2;CYP2E1;CYP3A4;HSD11B1;HSD11B2;HSD17B1;HSD17B2;HSD17B3;<br>HSD17B6;HSD17B7;HSD17B8;SRD5A1;SRD5A2;SULT1E1;|	1
KEGG	5.9.2	hsa04713	Circadian entrainment	1	1.78e-06	1.8e-05	36	2.1	CACNA1C;CACNA1D;CACNA1G;CACNA1H;CALM1;CALM2;CALM3;CALML3;CAMK2A;CAMK2D;<br>CAMK2G;FOS;GNB5;GRIA1;GRIA2;GRIA3;GRIA4;GRIN1;GRIN2A;GRIN2B;<br>GRIN2C;GRIN2D;GUCY1B3;ITPR1;ITPR3;KCNJ3;KCNJ5;KCNJ6;KCNJ9;MTNR1A;<br>MTNR1B;NOS1;NOS1AP;RYR1;RYR2;RYR3;|	1
KEGG	3.2.20	hsa04068	FoxO signaling pathway	1	2.09e-06	1.98e-05	45	2	ATM;BNIP3;CAT;CDK2;CDKN1A;CREBBP;EP300;FASLG;FOXO1;FOXO3;<br>FOXO4;GABARAP;GABARAPL1;GABARAPL2;GADD45A;GADD45B;GADD45G;HOMER1;IGF1;IGF1R;<br>IL10;INS;INSR;MDM2;PCK1;PRKAA1;PRKAA2;PRKAB1;PRKAB2;PRKAG1;<br>PRKAG2;PRKAG3;PRMT1;PTEN;RAG1;RAG2;SGK1;SIRT1;SMAD2;SMAD3;<br>SMAD4;SOD2;STAT3;TGFB1;TGFB2;|	1
KEGG	5.6.6	hsa04720	Long-term potentiation	1	2.12e-06	1.98e-05	28	2.3	CACNA1C;CALM1;CALM2;CALM3;CALML3;CAMK2A;CAMK2D;CAMK2G;CREBBP;EP300;<br>GRIA1;GRIA2;GRIN1;GRIN2A;GRIN2B;GRIN2C;GRIN2D;ITPR1;ITPR2;ITPR3;<br>PPP1CA;PPP1CC;PPP3CA;PPP3CB;PPP3R1;RPS6KA1;RPS6KA2;RPS6KA3;|	1
KEGG	5.2.12	hsa04919	Thyroid hormone signaling pathway	1	4.38e-06	3.93e-05	41	2	ACTG1;ATP1A1;ATP1A2;ATP1A3;BMP4;CREBBP;CTNNB1;EP300;ESR1;FOXO1;<br>HDAC1;HDAC2;HIF1A;ITGAV;ITGB3;MDM2;MED1;MED12;MED13;MED14;<br>MED16;MED17;MED24;MTOR;MYC;NCOA1;NCOA2;NCOA3;NCOR1;NOTCH1;<br>NOTCH2;PLN;RXRA;RXRB;RXRG;SRC;STAT1;THRA;THRB;TSC2;<br>WNT4;|	1
KEGG	4.4.2	hsa04520	Adherens junction	1	4.76e-06	4.11e-05	29	2.2	ACP1;ACTG1;ACTN2;ACTN3;CDC42;CREBBP;CSNK2A1;CSNK2A2;CSNK2B;CTNNB1;<br>EP300;ERBB2;FER;FGFR1;IGF1R;INSR;LEF1;PTPN1;PTPN6;RAC2;<br>RAC3;RHOA;SMAD2;SMAD3;SMAD4;SNAI1;SNAI2;SORBS1;SRC;|	1
KEGG	1.6.12	hsa00380	Tryptophan metabolism	1	1.01e-05	8.4e-05	19	2.8	ACMSD;ALDH1B1;ALDH2;ALDH3A2;ALDH7A1;AOC1;ASMT;CAT;CYP1A1;DDC;<br>HAAO;IDO1;KMO;KYNU;MAOA;MAOB;OGDH;TPH1;TPH2;|	1
KEGG	1.6.9	hsa00340	Histidine metabolism	1	1.41e-05	0.000113	15	3.1	ACY3;ALDH1A3;ALDH1B1;ALDH2;ALDH3A1;ALDH3A2;ALDH3B1;ALDH3B2;ALDH7A1;AOC1;<br>ASPA;DDC;FTCD;MAOA;MAOB;|	1
KEGG	1.6.8	hsa00330	Arginine and proline metabolism	1	1.95e-05	0.000151	24	2.4	ACY1;ALDH1B1;ALDH2;ALDH3A2;ALDH7A1;AOC1;ARG1;ARG2;ASS1;GAMT;<br>GATM;GLUL;GOT1;GOT2;MAOA;MAOB;NOS1;NOS2;NOS3;OAT;<br>OTC;P4HA1;P4HA2;P4HA3;|	1
KEGG	5.3.2	hsa04261	Adrenergic signaling in cardiomyocytes	1	3.14e-05	0.000236	46	1.8	ADRA1A;ADRA1B;ADRA1D;ADRB1;ADRB2;AGTR1;AGTR2;ATP1A1;ATP1A2;ATP1A3;<br>ATP2B4;BCL2;CACNA1C;CACNA1D;CACNA1F;CACNA1S;CACNA2D1;CACNA2D2;CACNB1;CACNB2;<br>CACNB3;CACNB4;CACNG1;CACNG2;CACNG3;CALM1;CALM2;CALM3;CALML3;CAMK2A;<br>CAMK2D;CAMK2G;KCNQ1;PLN;PPP1CA;PPP1CC;PPP2CA;PPP2CB;RYR2;SCN1B;<br>SCN4B;SCN5A;SCN7A;SLC8A1;TNNC1;TPM1;|	1
KEGG	1.6.1	hsa00250	Alanine, aspartate and glutamate metabolism	1	3.27e-05	0.000238	17	2.7	ABAT;ACY3;ADSS;ADSSL1;AGXT;AGXT2;ALDH5A1;ASNS;ASPA;ASS1;<br>CAD;GLUL;GOT1;GOT2;GPT;GPT2;PPAT;|	1
KEGG	5.3.3	hsa04270	Vascular smooth muscle contraction	1	8.27e-05	0.000584	38	1.8	ADORA2A;ADORA2B;ADRA1A;ADRA1B;ADRA1D;AGTR1;AVPR1A;AVPR1B;CACNA1C;CACNA1D;<br>CACNA1F;CACNA1S;CALM1;CALM2;CALM3;CALML3;EDNRA;GUCY1B3;ITPR1;ITPR2;<br>ITPR3;KCNMA1;KCNMB1;KCNMB2;KCNMB3;KCNMB4;NPR1;NPR2;PLA2G1B;PLA2G2A;<br>PLA2G2E;PPP1CA;PPP1CC;PRKCD;PTGIR;RHOA;ROCK1;ROCK2;|	1
KEGG	1.7.1	hsa00410	beta-Alanine metabolism	1	0.000191	0.0013	14	2.7	ABAT;ALDH1A3;ALDH1B1;ALDH2;ALDH3A1;ALDH3A2;ALDH3B1;ALDH3B2;ALDH7A1;AOC2;<br>AOC3;DPYD;DPYS;MLYCD;|	1
KEGG	2.2.4	hsa00970	Aminoacyl-tRNA biosynthesis	1	0.000195	0.0013	18	2.4	AARS;AARS2;DARS;DARS2;GARS;IARS;IARS2;KARS;LARS;LARS2;<br>MTFMT;NARS;NARS2;VARS;WARS;WARS2;YARS;YARS2;|	1
KEGG	1.6.3	hsa00270	Cysteine and methionine metabolism	1	0.000204	0.00132	16	2.5	ADI1;AHCY;AHCYL1;APIP;CDO1;DNMT1;DNMT3A;DNMT3B;ENOPH1;GOT1;<br>GOT2;MDH2;MRI1;MTAP;MTR;TAT;|	1
KEGG	5.6.3	hsa04725	Cholinergic synapse	1	0.000209	0.00132	35	1.8	ACHE;BCL2;CACNA1A;CACNA1B;CACNA1C;CACNA1D;CACNA1F;CACNA1S;CAMK2A;CAMK2D;<br>CAMK2G;CHAT;CHRM1;CHRM2;CHRM3;CHRM4;CHRM5;CHRNA3;CHRNA4;CHRNA6;<br>CHRNA7;CHRNB2;CHRNB4;FOS;GNB5;ITPR1;ITPR2;ITPR3;KCNJ3;KCNJ6;<br>KCNQ1;KCNQ2;KCNQ3;SLC18A3;SLC5A7;|	1
KEGG	1.5	#	Nucleotide metabolism	1	0.000315	0.00193	54	1.5	ADA;ADK;ADSS;ADSSL1;AMPD3;APRT;ATIC;CAD;CMPK2;CTPS1;<br>DHODH;DPYD;DPYS;DTYMK;DUT;GART;GUCY1B3;HPRT1;NPR1;NPR2;<br>NT5C1A;NT5E;NT5M;NUDT9;PAICS;PDE10A;PDE11A;PDE1A;PDE1B;PDE1C;<br>PDE2A;PDE3A;PDE3B;PDE4A;PDE4B;PDE4C;PDE4D;PDE5A;PDE6A;PDE6B;<br>PDE6C;PDE7A;PDE7B;PDE8A;PDE8B;PDE9A;PNP;POLA1;POLA2;POLR1B;<br>POLR2D;PPAT;TYMP;TYMS;|	1
KEGG	4.3.5	hsa04114	Oocyte meiosis	1	0.000323	0.00193	34	1.8	ANAPC2;AR;AURKA;CALM1;CALM2;CALM3;CALML3;CAMK2A;CAMK2D;CAMK2G;<br>CCNE1;CDC20;CDK2;IGF1;IGF1R;INS;ITPR1;ITPR2;ITPR3;PGR;<br>PPP1CA;PPP1CC;PPP2CA;PPP2CB;PPP3CA;PPP3CB;PPP3R1;RPS6KA1;RPS6KA2;RPS6KA3;<br>YWHAE;YWHAH;YWHAQ;YWHAZ;|	1
KEGG	4.3.1	hsa04110	Cell cycle	1	0.00082	0.00478	36	1.6	ABL1;ANAPC2;ATM;CCNA2;CCND3;CCNE1;CCNH;CDC20;CDC25B;CDC45;<br>CDK2;CDK7;CDKN1A;CDKN2A;CREBBP;EP300;GADD45A;GADD45B;GADD45G;HDAC1;<br>HDAC2;MCM3;MDM2;MYC;PRKDC;RB1;SMAD2;SMAD3;SMAD4;TGFB1;<br>TGFB2;YWHAE;YWHAH;YWHAQ;YWHAZ;ZBTB17;|	1
KEGG	4.3	#	Cell growth and death	1	0.000891	0.00506	74	1.4	ABL1;ANAPC2;AR;ATM;AURKA;BAX;BCL2;BCL2L1;CALM1;CALM2;<br>CALM3;CALML3;CAMK2A;CAMK2D;CAMK2G;CCNA2;CCND3;CCNE1;CCNH;CDC20;<br>CDC25B;CDC45;CDK2;CDK7;CDKN1A;CDKN2A;CREBBP;EP300;FADD;FAS;<br>FASLG;GADD45A;GADD45B;GADD45G;HDAC1;HDAC2;IGF1;IGF1R;INS;ITPR1;<br>ITPR2;ITPR3;MCM3;MDM2;MYC;NGF;NTRK1;PGR;PPP1CA;PPP1CC;<br>PPP2CA;PPP2CB;PPP3CA;PPP3CB;PPP3R1;PRKDC;PTEN;RB1;RIPK1;RPS6KA1;<br>RPS6KA2;RPS6KA3;SER…	1
KEGG	5.2.4	hsa03320	PPAR signaling pathway	1	0.000928	0.00515	23	1.9	ACSL1;ACSL3;ACSL4;ADIPOQ;APOA1;APOA2;CD36;CYP27A1;FABP2;FABP3;<br>FABP6;FADS2;ILK;NR1H3;PCK1;PPARA;PPARD;PPARG;RXRA;RXRB;<br>RXRG;SORBS1;UBC;|	1
KEGG	5.2.1	hsa04911	Insulin secretion	1	0.000993	0.00538	27	1.8	ATP1A1;ATP1A2;ATP1A3;CACNA1C;CACNA1D;CACNA1F;CACNA1S;CAMK2A;CAMK2D;CAMK2G;<br>CHRM3;FFAR1;INS;ITPR3;KCNJ11;KCNMA1;KCNMB1;KCNMB2;KCNMB3;KCNMB4;<br>KCNN1;KCNN2;KCNN3;KCNN4;RAB3A;RYR2;STX1A;|	1
KEGG	5.4	#	Digestive system	1	0.00117	0.0062	89	1.4	|ABCA1;ABCC2;ABCC4;ACE2;ADRA1A;ADRA1B;ADRA1D;ADRB1;ADRB2;ADRB3;<br>APOA1;AQP1;AQP8;ATP1A1;ATP1A2;ATP1A3;ATP2A1;ATP2B4;ATP4A;BAAT;<br>CA2;CACNA1D;CALM1;CALM2;CALM3;CALML3;CAMK2A;CAMK2D;CAMK2G;CD36;<br>CFTR;CHRM3;COL1A1;COL5A1;CYP3A4;EZR;FABP2;GNAT3;GOT2;GUCY1B3;<br>HMGCR;HMOX1;HRH2;HTN1;ITPR1;ITPR2;ITPR3;KCNE2;KCNJ1;KCNJ10;<br>KCNK2;KCNMA1;KCNN2;KCNN4;KCNQ1;LCT;LDLR;LRAT;LYZ;MMACHC;<br>MTTP;NOS1;N…	1
KEGG	1.9.10	hsa00830	Retinol metabolism	1	0.00121	0.00627	21	1.9	ADH1A;ADH1B;ADH1C;ADH4;ADH7;ALDH1A1;ALDH1A2;CYP1A1;CYP2B6;CYP3A4;<br>DHRS3;DHRS4;DHRS9;HSD17B6;LRAT;RDH10;RDH11;RDH12;RDH5;RDH8;<br>RETSAT;|	1
KEGG	5.4.2	hsa04971	Gastric acid secretion	1	0.00139	0.00704	24	1.9	ATP1A1;ATP1A2;ATP1A3;ATP4A;CA2;CALM1;CALM2;CALM3;CALML3;CAMK2A;<br>CAMK2D;CAMK2G;CFTR;CHRM3;EZR;HRH2;ITPR1;ITPR2;ITPR3;KCNE2;<br>KCNJ1;KCNJ10;KCNK2;KCNQ1;|	1
KEGG	5.2.6	hsa04913	Ovarian Steroidogenesis	1	0.00157	0.00778	18	2	AKR1C3;ALOX5;BMP6;CYP11A1;CYP17A1;CYP19A1;CYP1A1;HSD17B1;HSD17B2;HSD17B7;<br>IGF1;IGF1R;INS;INSR;LDLR;LHCGR;PTGS2;STAR;|	1
KEGG	3.2.25	hsa04152	AMPK signaling pathway	1	0.00166	0.00806	35	1.6	ACACA;ACACB;ADIPOQ;ADRA1A;CCNA2;CD36;CFTR;FBP1;FOXO1;FOXO3;<br>HMGCR;HNF4A;IGF1;IGF1R;INS;INSR;LEP;MLYCD;MTOR;PCK1;<br>PPARG;PPARGC1A;PPP2CA;PPP2CB;PRKAA1;PRKAA2;PRKAB1;PRKAB2;PRKAG1;PRKAG2;<br>PRKAG3;RPS6KB1;SIRT1;SREBF1;TSC2;|	1
KEGG	3.2.5	hsa04010	MAPK signaling pathway	1	0.00173	0.0082	63	1.4	ARRB1;ARRB2;BDNF;CACNA1A;CACNA1B;CACNA1C;CACNA1D;CACNA1F;CACNA1G;CACNA1H;<br>CACNA1S;CACNA2D1;CACNA2D2;CACNB1;CACNB2;CACNB3;CACNB4;CACNG1;CACNG2;CACNG3;<br>CDC25B;CDC42;FAS;FASLG;FGF1;FGF10;FGF23;FGFR1;FGFR2;FLNA;<br>FOS;GADD45A;GADD45B;GADD45G;HSPA1L;JUND;MAP2K5;MAP3K1;MECOM;MEF2C;<br>MKNK2;MYC;NFKB2;NGF;NTRK1;NTRK2;PAK1;PDGFA;PDGFB;PDGFRA;<br>PDGFRB;PPP3CA;PPP3CB;PPP3R1;PPP5C;RAC2;RAC3;RAPGEF2;…	1
KEGG	5.4.1	hsa04970	Salivary secretion	1	0.00176	0.0082	27	1.8	ADRA1A;ADRA1B;ADRA1D;ADRB1;ADRB2;ADRB3;ATP1A1;ATP1A2;ATP1A3;ATP2B4;<br>CALM1;CALM2;CALM3;CALML3;CHRM3;GUCY1B3;HTN1;ITPR1;ITPR2;ITPR3;<br>KCNMA1;KCNN4;LYZ;NOS1;RYR3;SLC12A2;STATH;|	1
KEGG	1.1	#	Overview	1	0.00218	0.00981	45	1.5	ACACA;ACACB;ACADSB;ACSL1;ACSL3;ACSL4;ACY1;AGXT;ALDH7A1;AMT;<br>ARG1;ARG2;ASS1;BCAT1;BCAT2;FADS1;FADS2;FBP1;G6PD;GLDC;<br>GLUL;GOT1;GOT2;GPT;GPT2;HACD1;MDH2;MECR;MTHFR;MTR;<br>MUT;OGDH;OTC;PAH;PC;PCCA;PCCB;PECR;PGD;PGLS;<br>SHMT1;SHMT2;TALDO1;TAT;TKT;|	1
KEGG	5.7.5	hsa04750	Inflammatory mediator regulation of TRP channels	1	0.00219	0.00981	29	1.7	BDKRB2;CALM1;CALM2;CALM3;CALML3;CAMK2A;CAMK2D;CAMK2G;F2RL1;HRH1;<br>HTR2A;HTR2B;HTR2C;IGF1;ITPR1;ITPR2;ITPR3;NGF;NTRK1;PPP1CA;<br>PPP1CC;PRKCD;PTGER2;PTGER4;SRC;TRPA1;TRPM8;TRPV1;TRPV3;|	1
KEGG	5.2.3	hsa04920	Adipocytokine signaling pathway	1	0.00279	0.0123	22	1.8	ACACB;ACSL1;ACSL3;ACSL4;ADIPOQ;CD36;LEP;MTOR;PCK1;PPARA;<br>PPARGC1A;PRKAA1;PRKAA2;PRKAB1;PRKAB2;PRKAG1;PRKAG2;PRKAG3;RXRA;RXRB;<br>RXRG;STAT3;|	1
KEGG	1.5.1	hsa00230	Purine metabolism	1	0.00303	0.0131	44	1.5	ADA;ADK;ADSS;ADSSL1;AMPD3;APRT;ATIC;GART;GUCY1B3;HPRT1;<br>NPR1;NPR2;NT5C1A;NT5E;NT5M;NUDT9;PAICS;PDE10A;PDE11A;PDE1A;<br>PDE1B;PDE1C;PDE2A;PDE3A;PDE3B;PDE4A;PDE4B;PDE4C;PDE4D;PDE5A;<br>PDE6A;PDE6B;PDE6C;PDE7A;PDE7B;PDE8A;PDE8B;PDE9A;PNP;POLA1;<br>POLA2;POLR1B;POLR2D;PPAT;|	1
KEGG	1.4	#	Lipid metabolism	1	0.00319	0.0135	85	1.3	ACACA;ACACB;ACADSB;ACHE;ACSL1;ACSL3;ACSL4;ADH1A;ADH1B;ADH1C;<br>ADH4;ADH7;AKR1B10;AKR1C1;AKR1C2;AKR1C3;AKR1C4;AKR1D1;ALDH1B1;ALDH2;<br>ALDH3A2;ALDH7A1;ALOX15;ALOX15B;ALOX5;BAAT;CBR1;CBR3;CERS2;CHAT;<br>CHKA;COMT;CYP11A1;CYP11B1;CYP11B2;CYP17A1;CYP19A1;CYP1A1;CYP21A2;CYP24A1;<br>CYP27A1;CYP27B1;CYP2B6;CYP2E1;CYP2R1;CYP3A4;CYP4F2;DGKA;DGKI;ELOVL4;<br>ENPP6;EPHX2;FADS1;FADS2;GAL3ST1;GBA;GBA2;GPX7;HA…	1
KEGG	3.2.19	hsa04066	HIF-1 signaling pathway	1	0.00331	0.0135	30	1.7	ANGPT1;ARNT;BCL2;CAMK2A;CAMK2D;CAMK2G;CDKN1A;CREBBP;CYBB;EDN1;<br>EP300;EPO;ERBB2;HIF1A;HMOX1;IFNG;IGF1;IGF1R;INS;INSR;<br>MKNK2;MTOR;NOS2;NOS3;NOX1;NPPA;RPS6KB1;SERPINE1;STAT3;TLR4;<br>|	1
KEGG	5.6.1	hsa04724	Glutamatergic synapse	1	0.00329	0.0135	32	1.6	ADRBK1;CACNA1A;CACNA1C;CACNA1D;DLG4;GLUL;GNB5;GRIA1;GRIA2;GRIA3;<br>GRIA4;GRIK2;GRIN1;GRIN2A;GRIN2B;GRIN2C;GRIN2D;GRIN3A;GRIN3B;GRM7;<br>HOMER1;ITPR1;ITPR2;ITPR3;KCNJ3;PPP3CA;PPP3CB;PPP3R1;SHANK3;SLC17A7;<br>SLC1A1;SLC38A3;|	1
KEGG	1.6.13	hsa00400	Phenylalanine, tyrosine and tryptophan biosynthesis	1	0.0039	0.0157	4	4.6	GOT1;GOT2;PAH;TAT;|	1
KEGG	5.2.14	hsa04614	Renin-angiotensin system	1	0.00447	0.0177	8	2.7	ACE;ACE2;AGT;AGTR1;AGTR2;CTSG;MAS1;REN;|	1
KEGG	5.2.7	hsa04915	Estrogen signaling pathway	1	0.00524	0.0203	28	1.6	CALM1;CALM2;CALM3;CALML3;ESR1;ESR2;FKBP4;FKBP5;FOS;GABBR1;<br>GABBR2;GPER1;HSP90AA1;HSP90AB1;HSPA1L;ITPR1;ITPR2;ITPR3;KCNJ3;KCNJ5;<br>KCNJ6;KCNJ9;NOS3;OPRM1;PRKCD;SHC1;SP1;SRC;|	1
KEGG	1.2.11	hsa00630	Glyoxylate and dicarboxylate metabolism	1	0.00631	0.0241	10	2.3	AGXT;CAT;GCSH;GLUL;MDH2;MUT;PCCA;PCCB;SHMT1;SHMT2;<br>|	1
KEGG	5.7.1	hsa04744	Phototransduction	1	0.00679	0.0255	11	2.2	ARRB1;ARRB2;CALM1;CALM2;CALM3;CALML3;GNAT1;GNAT3;PDE6A;PDE6B;<br>RHO;|	1
KEGG	5.2.2	hsa04910	Insulin signaling pathway	1	0.0087	0.0322	36	1.5	ACACA;ACACB;CALM1;CALM2;CALM3;CALML3;FBP1;FLOT1;FOXO1;INS;<br>INSR;MKNK2;MTOR;PCK1;PDE3A;PDE3B;PHKG2;PPARGC1A;PPP1CA;PPP1CC;<br>PRKAA1;PRKAA2;PRKAB1;PRKAB2;PRKAG1;PRKAG2;PRKAG3;PTPN1;PYGB;PYGL;<br>PYGM;RPS6KB1;SHC1;SORBS1;SREBF1;TSC2;|	1
KEGG	1.12	#	Xenobiotics biodegradation and metabolism	1	0.00978	0.0356	29	1.5	ADH1A;ADH1B;ADH1C;ADH4;ADH7;AKR1C1;AKR1C2;AKR1C4;ALDH1A3;ALDH3A1;<br>ALDH3B1;ALDH3B2;CBR1;CBR3;CES1;CYP1A1;CYP2B6;CYP2E1;CYP3A4;DHDH;<br>DPYD;DPYS;GSTP1;HPRT1;HSD11B1;MAOA;MAOB;TPMT;TYMP;|	1
KEGG	1.1.4	hsa01230	Biosynthesis of amino acids	1	0.0105	0.0376	21	1.6	ACY1;ALDH7A1;ARG1;ARG2;ASS1;BCAT1;BCAT2;GLUL;GOT1;GOT2;<br>GPT;GPT2;MTR;OTC;PAH;PC;SHMT1;SHMT2;TALDO1;TAT;<br>TKT;|	1
KEGG	5.5.2	hsa04960	Aldosterone-regulated sodium reabsorption	1	0.0116	0.041	13	1.9	ATP1A1;ATP1A2;ATP1A3;HSD11B2;IGF1;INS;INSR;KCNJ1;NR3C2;SCNN1A;<br>SCNN1B;SCNN1G;SGK1;|	1
KEGG	1.12.20	hsa00980	Metabolism of xenobiotics by cytochrome P450	1	0.0124	0.0431	21	1.6	ADH1A;ADH1B;ADH1C;ADH4;ADH7;AKR1C1;AKR1C2;AKR1C4;ALDH1A3;ALDH3A1;<br>ALDH3B1;ALDH3B2;CBR1;CBR3;CYP1A1;CYP2B6;CYP2E1;CYP3A4;DHDH;GSTP1;<br>HSD11B1;|	1
KEGG	1.6.4	hsa00280	Valine, leucine and isoleucine degradation	1	0.0139	0.0476	14	1.8	ABAT;ACADSB;ALDH1B1;ALDH2;ALDH3A2;ALDH7A1;BCAT1;BCAT2;HIBADH;MCCC1;<br>MCCC2;MUT;PCCA;PCCB;|	1
KEGG	1.2.12	hsa00640	Propanoate metabolism	1	0.0154	0.052	11	2	ABAT;ACACA;ACACB;ALDH1B1;ALDH2;ALDH3A2;ALDH7A1;MLYCD;MUT;PCCA;<br>PCCB;|	0
KEGG	1.1.2	hsa01210	2-Oxocarboxylic acid metabolism	1	0.0181	0.0602	7	2.3	ACY1;BCAT1;BCAT2;GOT1;GOT2;GPT;GPT2;|	0
KEGG	1.4.14	hsa00590	Arachidonic acid metabolism	1	0.0184	0.0604	18	1.6	AKR1C3;ALOX15;ALOX15B;ALOX5;CBR1;CBR3;CYP2B6;CYP2E1;CYP4F2;EPHX2;<br>GPX7;PLA2G1B;PLA2G2A;PLA2G2E;PTGES3;PTGIS;PTGS1;PTGS2;|	0
KEGG	1.9.8	hsa00790	Folate biosynthesis	1	0.023	0.0744	6	2.5	DHFR;DHFRL1;FPGS;GGH;QDPR;SPR;|	0
KEGG	3.2.4	hsa04015	Rap1 signaling pathway	1	0.0294	0.0926	48	1.3	ACTG1;ADORA2A;ADORA2B;ANGPT1;BCAR1;CALM1;CALM2;CALM3;CALML3;CDC42;<br>CNR1;CSF1;CSF1R;CTNNB1;DOCK4;DRD2;F2R;FGF1;FGF10;FGF23;<br>FGFR1;FGFR2;GRIN1;GRIN2A;GRIN2B;IGF1;IGF1R;INS;INSR;ITGAL;<br>ITGB2;ITGB3;KIT;KITLG;MAGI2;NGF;NGFR;P2RY1;PDGFA;PDGFB;<br>PDGFRA;PDGFRB;RAC2;RAC3;RAPGEF2;RHOA;SIPA1;SRC;|	0
KEGG	3.2.12	hsa04350	TGF-beta signaling pathway	1	0.0293	0.0926	21	1.5	ACVR1;ACVR2A;BMP2;BMP4;BMP5;BMP6;CREBBP;EP300;IFNG;MYC;<br>PPP2CA;PPP2CB;RHOA;ROCK1;RPS6KB1;SMAD2;SMAD3;SMAD4;SP1;TGFB1;<br>TGFB2;|	0
KEGG	1.4.3	hsa00071	Fatty acid degradation	1	0.032	0.0994	13	1.7	ACADSB;ACSL1;ACSL3;ACSL4;ADH1A;ADH1B;ADH1C;ADH4;ADH7;ALDH1B1;<br>ALDH2;ALDH3A2;ALDH7A1;|	0
KEGG	5.4.4	hsa04976	Bile secretion	1	0.0352	0.108	19	1.5	ABCC2;ABCC4;AQP1;AQP8;ATP1A1;ATP1A2;ATP1A3;BAAT;CA2;CFTR;<br>CYP3A4;HMGCR;KCNN2;LDLR;NR0B2;NR1H4;RXRA;SLC22A1;SLC22A8;|	0
KEGG	1.9.4	hsa00760	Nicotinate and nicotinamide metabolism	1	0.0418	0.126	9	1.8	NAMPT;NAPRT;NNMT;NT5C1A;NT5E;NT5M;NUDT12;PNP;QPRT;|	0
KEGG	5.1.2	hsa04610	Complement and coagulation cascades	1	0.044	0.131	18	1.5	BDKRB2;C5;CFH;F10;F12;F2;F2R;F3;F7;F9;<br>FGA;PLAT;PROC;PROS1;SERPINE1;SERPINF2;TFPI;THBD;|	0
KEGG	3.2.13	hsa04390	Hippo signaling pathway	1	0.0469	0.135	35	1.3	ACTG1;AREG;BMP2;BMP4;BMP5;BMP6;CCND3;CTNNB1;DLG4;FGF1;<br>ITGB2;LEF1;MYC;PPP1CA;PPP1CC;PPP2CA;PPP2CB;SCRIB;SERPINE1;SMAD2;<br>SMAD3;SMAD4;SNAI2;TGFB1;TGFB2;WNT10B;WNT11;WNT2;WNT2B;WNT4;<br>WNT5A;YWHAE;YWHAH;YWHAQ;YWHAZ;|	0
KEGG	5.1.14	hsa04670	Leukocyte transendothelial migration	1	0.0468	0.135	28	1.4	ACTG1;ACTN2;ACTN3;BCAR1;CDC42;CDH5;CLDN5;CTNNB1;CXCR4;CYBA;<br>CYBB;EZR;ICAM1;ITGAL;ITGB2;MSN;NCF1;NCF2;NCF4;NOX1;<br>PTK2B;RAC2;RHOA;ROCK1;ROCK2;SIPA1;VAV3;VCAM1;|	0
KEGG	5.6.7	hsa04730	Long-term depression	1	0.0464	0.135	16	1.6	CACNA1A;CRH;CRHR1;GRIA1;GRIA2;GRIA3;GUCY1B3;IGF1;IGF1R;ITPR1;<br>ITPR2;ITPR3;NOS1;PPP2CA;PPP2CB;RYR1;|	0
KEGG	5.6.10	hsa04722	Neurotrophin signaling pathway	1	0.0564	0.16	28	1.3	ABL1;BAX;BCL2;BDNF;CALM1;CALM2;CALM3;CALML3;CAMK2A;CAMK2D;<br>CAMK2G;CDC42;FASLG;FOXO3;MAP2K5;MAP3K1;NGF;NGFR;NTRK1;NTRK2;<br>PRKCD;RHOA;RPS6KA1;RPS6KA2;RPS6KA3;SHC1;SORT1;YWHAE;|	0
KEGG	5.2.13	hsa04916	Melanogenesis	1	0.0614	0.172	24	1.3	CALM1;CALM2;CALM3;CALML3;CAMK2A;CAMK2D;CAMK2G;CREBBP;CTNNB1;DCT;<br>EDN1;EP300;KIT;KITLG;LEF1;MC1R;TYR;TYRP1;WNT10B;WNT11;<br>WNT2;WNT2B;WNT4;WNT5A;|	0
KEGG	1.9.12	hsa00130	Ubiquinone and other terpenoid-quinone biosynthesis	1	0.0791	0.219	4	2.4	GGCX;NQO1;TAT;VKORC1;|	0
KEGG	5.5.4	hsa04964	Proximal tubule bicarbonate reclamation	1	0.0893	0.245	7	1.8	AQP1;ATP1A1;ATP1A2;ATP1A3;CA2;PCK1;SLC38A3;|	0
KEGG	1.4.6	hsa00100	Steroid biosynthesis	1	0.0965	0.261	6	1.8	CYP24A1;CYP27B1;CYP2R1;HSD17B7;SOAT1;SOAT2;|	0
KEGG	1.2.10	hsa00620	Pyruvate metabolism	1	0.0991	0.262	11	1.5	ACACA;ACACB;AKR1B10;ALDH1B1;ALDH2;ALDH3A2;ALDH7A1;GLO1;MDH2;PC;<br>PCK1;|	0
KEGG	3.2.17	hsa04064	NF-kappa B signaling pathway	1	0.0982	0.262	21	1.3	ATM;BCL2;BCL2L1;CSNK2A1;CSNK2A2;CSNK2B;GADD45B;ICAM1;LCK;LTA;<br>NFKB2;PTGS2;RIPK1;SYK;TIRAP;TLR4;TNFAIP3;TNFSF11;TRIM25;UBE2I;<br>VCAM1;|	0
KEGG	3.2.9	hsa04310	Wnt signaling pathway	1	0.106	0.278	30	1.3	CAMK2A;CAMK2D;CAMK2G;CCND3;CREBBP;CSNK2A1;CSNK2A2;CSNK2B;CTNNB1;CTNNBIP1;<br>EP300;LEF1;MYC;NKD2;PPARD;PPP3CA;PPP3CB;PPP3R1;RAC2;RAC3;<br>RHOA;ROCK2;SMAD3;SMAD4;WNT10B;WNT11;WNT2;WNT2B;WNT4;WNT5A;<br>|	0
KEGG	1.7	#	Metabolism of other amino acids	1	0.114	0.295	24	1.3	ABAT;ALDH1A3;ALDH1B1;ALDH2;ALDH3A1;ALDH3A2;ALDH3B1;ALDH3B2;ALDH7A1;AOC2;<br>AOC3;BAAT;CDO1;DPYD;DPYS;G6PD;GPX7;GSS;GSTP1;MLYCD;<br>MTR;PGD;SHMT1;SHMT2;|	0
KEGG	5.8.3	hsa04380	Osteoclast differentiation	1	0.117	0.296	28	1.3	CSF1;CSF1R;CYBA;CYBB;FCGR1A;FHL2;FOS;IFNG;ITGB3;JUNB;<br>JUND;LCK;LILRB1;NCF1;NCF2;NCF4;NFKB2;NOX1;PPARG;PPP3CA;<br>PPP3CB;PPP3R1;SPI1;STAT1;SYK;TGFB1;TGFB2;TNFSF11;|	0
KEGG	5.9.1	hsa04710	Circadian rhythm	1	0.116	0.296	8	1.6	NR1D1;PRKAA1;PRKAA2;PRKAB1;PRKAB2;PRKAG1;PRKAG2;PRKAG3;|	0
KEGG	4.3.7	hsa04115	p53 signaling pathway	1	0.12	0.301	16	1.3	ATM;BAX;CCND3;CCNE1;CDK2;CDKN1A;CDKN2A;FAS;GADD45A;GADD45B;<br>GADD45G;IGF1;MDM2;PTEN;SERPINE1;TSC2;|	0
KEGG	1.6.5	hsa00290	Valine, leucine and isoleucine biosynthesis	1	0.142	0.345	2	2.9	BCAT1;BCAT2;|	0
KEGG	1.9.1	hsa00730	Thiamine metabolism	1	0.142	0.345	2	2.9	NFS1;TPK1;|	0
KEGG	1.9.2	hsa00740	Riboflavin metabolism	1	0.14	0.345	4	1.9	ACP1;BLVRB;RFK;TYR;|	0
KEGG	1.2.1	hsa00010	Glycolysis / Gluconeogenesis	1	0.16	0.38	15	1.4	ADH1A;ADH1B;ADH1C;ADH4;ADH7;ALDH1A3;ALDH1B1;ALDH2;ALDH3A1;ALDH3A2;<br>ALDH3B1;ALDH3B2;ALDH7A1;FBP1;PCK1;|	0
KEGG	4.1.1	hsa04144	Endocytosis	1	0.161	0.38	41	1.2	ADRB1;ADRB2;ADRB3;ADRBK1;ARRB1;ARRB2;CAV1;CAV2;CAV3;CDC42;<br>CSF1R;CXCR1;CXCR4;DAB2;DNM3;EEA1;F2R;FGFR2;FOLR1;FOLR2;<br>FOLR3;HSPA1L;IGF1R;KIT;LDLR;MDM2;NEDD4;NTRK1;PDGFRA;PML;<br>RAB11FIP1;RAB11FIP3;RAB11FIP5;RAB7A;RET;RHOA;SMAD2;SMAD3;SRC;TGFB1;<br>TGFB2;|	0
KEGG	3.2.11	hsa04340	Hedgehog signaling pathway	1	0.163	0.38	12	1.4	1.63e-001|3.80e-001|12|1.4|BMP2;BMP4;GLI3;LRP2;SHH;SMO;WNT10B;WNT11;WNT2;WNT2B;<br>WNT4;WNT5A;|	0
KEGG	5.7.4	hsa04742	Taste transduction	1	0.163	0.38	12	1.4	CACNA1A;CACNA1B;GNAT3;ITPR3;KCNB1;PDE1A;SCNN1A;SCNN1B;SCNN1G;TAS1R1;<br>TAS1R2;TAS1R3;|	0
KEGG	2.4.8	hsa03450	Non-homologous end-joining	1	0.176	0.4	4	1.7	LIG4;PRKDC;XRCC4;XRCC6;|	0
KEGG	3.2.24	hsa04151	PI3K-Akt signaling pathway	1	0.174	0.4	67	1.1	ANGPT1;BCL2;BCL2L1;BRCA1;CCND3;CCNE1;CDK2;CDKN1A;CHRM1;CHRM2;<br>COL1A1;COL5A1;CSF1;CSF1R;EPO;EPOR;F2R;FASLG;FGF1;FGF10;<br>FGF23;FGFR1;FGFR2;FOXO3;GNB5;HSP90AA1;HSP90AB1;IGF1;IGF1R;IL4;<br>INS;INSR;ITGAV;ITGB3;KIT;KITLG;LAMA3;MCL1;MDM2;MTOR;<br>MYC;NGF;NGFR;NOS3;PCK1;PDGFA;PDGFB;PDGFRA;PDGFRB;PIK3AP1;<br>PPP2CA;PPP2CB;PRKAA1;PRKAA2;PRLR;PTEN;RPS6KB1;RXRA;SGK1;SYK;<br>TLR4;TNR;TSC2;YWHAE;YWHAH;YW…	0
KEGG	5.4.3	hsa04972	Pancreatic secretion	1	0.177	0.4	20	1.3	ATP1A1;ATP1A2;ATP1A3;ATP2A1;ATP2B4;CA2;CFTR;CHRM3;ITPR1;ITPR2;<br>ITPR3;KCNMA1;KCNQ1;PLA2G1B;PLA2G2A;PLA2G2E;RHOA;RYR2;SLC12A2;SLC26A3;<br>|	0
KEGG	5.5	#	Excretory system	1	0.186	0.417	31	1.2	AQP1;AQP2;ATP1A1;ATP1A2;ATP1A3;ATP4A;AVP;AVPR2;BDKRB2;CA2;<br>CALB1;DNM3;DYNC1H1;DYNLL1;ESR1;HSD11B2;IGF1;INS;INSR;KCNJ1;<br>KL;NR3C2;PCK1;SCNN1A;SCNN1B;SCNN1G;SGK1;SLC12A7;SLC38A3;SLC8A1;<br>VDR;|	0
KEGG	1.12.21	hsa00982	Drug metabolism - cytochrome P450	1	0.191	0.424	15	1.3	ADH1A;ADH1B;ADH1C;ADH4;ADH7;ALDH1A3;ALDH3A1;ALDH3B1;ALDH3B2;CYP2B6;<br>CYP2E1;CYP3A4;GSTP1;MAOA;MAOB;|	0
KEGG	1.1.3	hsa01212	Fatty acid metabolism	1	0.2	0.44	11	1.3	ACACA;ACACB;ACADSB;ACSL1;ACSL3;ACSL4;FADS1;FADS2;HACD1;MECR;<br>PECR;|	0
KEGG	5.4.7	hsa04975	Fat digestion and absorption	1	0.203	0.442	9	1.4	ABCA1;APOA1;CD36;FABP2;GOT2;MTTP;PLA2G1B;PLA2G2A;PLA2G2E;|	0
KEGG	4.2	#	Cell motility	1	0.211	0.447	42	1.1	ACTG1;ACTN2;ACTN3;BCAR1;BDKRB2;CDC42;CHRM1;CHRM2;CHRM3;CHRM4;<br>CHRM5;DIAPH3;EZR;F2;F2R;FGF1;FGF10;FGF23;FGFR1;FGFR2;<br>INS;ITGAL;ITGAV;ITGB2;ITGB3;MSN;NCKAP1L;PAK1;PAK6;PDGFA;<br>PDGFB;PDGFRA;PDGFRB;PPP1CA;PPP1CC;RAC2;RAC3;RHOA;ROCK1;ROCK2;<br>SRC;VAV3;|	0
KEGG	1.1.1	hsa01200	Carbon metabolism	1	0.209	0.447	22	1.2	|AGXT;AMT;FBP1;G6PD;GLDC;GOT1;GOT2;GPT;GPT2;MDH2;<br>MTHFR;MUT;OGDH;PC;PCCA;PCCB;PGD;PGLS;SHMT1;SHMT2;<br>TALDO1;TKT;|	0
KEGG	4.2.4	hsa04810	Regulation of actin cytoskeleton	1	0.211	0.447	42	1.1	ACTG1;ACTN2;ACTN3;BCAR1;BDKRB2;CDC42;CHRM1;CHRM2;CHRM3;CHRM4;<br>CHRM5;DIAPH3;EZR;F2;F2R;FGF1;FGF10;FGF23;FGFR1;FGFR2;<br>INS;ITGAL;ITGAV;ITGB2;ITGB3;MSN;NCKAP1L;PAK1;PAK6;PDGFA;<br>PDGFB;PDGFRA;PDGFRB;PPP1CA;PPP1CC;RAC2;RAC3;RHOA;ROCK1;ROCK2;<br>SRC;VAV3;|	0

## Sheet: enrichmentAnalysis-GO
Category	GO id	Description	ClusterNum	cluster1-Pvalue	cluster1-Benjamini	cluster1-gene number	cluster1-EnrichRatio	cluster1-gene names
	GO:0003674	Molecular_function	1	1	1	1576	1	8-Mar;AARS;AARS2;ABAT;ABCA1;ABCC2;ABCC4;ABCC9;ABCG1;ABHD5;<br>ABL1;ACACA;ACACB;ACADSB;ACE;ACE2;ACHE;ACIN1;ACMSD;ACP1;<br>ACSL1;ACSL3;ACSL4;ACTA1;ACTG1;ACTL6A;ACTN2;ACTN3;ACVR1;ACVR2A;<br>ACY1;ACY3;ADA;ADAM17;ADAM8;ADAMTS20;ADAMTS9;ADAP1;ADAP2;ADCY3;<br>ADCY5;ADCY6;ADH1A;ADH1B;ADH1C;ADH4;ADH7;ADI1;ADIPOQ;ADIRF;<br>ADK;ADORA1;ADORA2A;ADORA2B;ADORA3;ADRA1A;ADRA1B;ADRA1D;ADRA2A;ADRA2B;<br>ADRA2C;ADRB…
MF	GO:0022857	Transmembrane Transporter Activity	1	3.26e-60	5.74e-59	281	2.7	ABCA1;ABCC2;ABCC4;ABCC9;ABCG1;ADRA2A;ADRB1;ADRB2;AGT;AHCYL1;<br>AKR1C4;ANO9;AQP1;AQP2;AQP8;ATP11C;ATP13A2;ATP1A1;ATP1A2;ATP1A3;<br>ATP2A1;ATP2B4;ATP4A;ATP5E;ATP8A2;ATP8B1;BAX;BCL2;CACNA1A;CACNA1B;<br>CACNA1C;CACNA1D;CACNA1F;CACNA1G;CACNA1H;CACNA1S;CACNA2D1;CACNA2D2;CACNB1;CACNB2;<br>CACNB3;CACNB4;CACNG1;CACNG2;CACNG3;CALHM1;CALM3;CAMK2D;CAV3;CCS;<br>CFTR;CHRFAM7A;CHRNA10;CHRNA2;CHRNA3;CHRNA4;CHRN…
MF	GO:0016491	Oxidoreductase Activity	1	4.31e-42	3.2e-41	209	2.6	ABCC4;ABL1;ACADSB;ACVR2A;ADH1A;ADH1B;ADH1C;ADH4;ADH7;ADI1;<br>AGT;AGTR1;AGTR2;AKR1B10;AKR1C1;AKR1C2;AKR1C3;AKR1C4;AKR1D1;AKT1;<br>ALDH1A1;ALDH1A2;ALDH1A3;ALDH1B1;ALDH1L1;ALDH2;ALDH3A1;ALDH3A2;ALDH3B1;ALDH3B2;<br>ALDH5A1;ALDH7A1;ALDH8A1;ALOX15;ALOX15B;ALOX5;ALOX5AP;AOC1;AOC2;AOC3;<br>APOE;ARG2;ASPDH;ASPH;BLVRB;BMP2;CALM3;CAT;CAV1;CAV3;<br>CBR1;CBR3;CBR4;CDO1;CHDH;CNR1;CNR2;COX1;COX2;COX3;<br>COX4I…
MF	GO:0019899	Enzyme Binding	1	2.38e-40	1.53e-39	224	2.5	ABAT;ABCA1;ABL1;ACIN1;ACTG1;ADORA2A;ADRA2A;ADRB2;AKT1;AKT2;<br>ALOX5AP;ANAPC2;APOA1;AR;ARG2;ARHGEF2;ARRB1;ARRB2;AURKA;AVPR1A;<br>AVPR1B;BCAR1;BCHE;BCL2;BDKRB2;BICD1;BNIP3;BRCA1;CAD;CALM3;<br>CALR;CAV1;CAV3;CCNA2;CCNC;CCND1;CCND3;CCNE1;CCNH;CCNT1;<br>CD74;CDC20;CDC25B;CDC42;CDH5;CDK5R1;CDKN2A;CFTR;CTNNB1;CUL4B;<br>CXCR4;CYB5A;CYP1A1;CYP2E1;CYP3A4;DAB2IP;DGKI;DIAPH3;DNAJA3;DOCK4;<br>DOCK5;DYNLL1;EG…
MF	GO:0004871	Signal Transducer Activity	1	3.3e-34	1.79e-33	354	1.8	ABCA1;ABCC9;ACVR1;ACVR2A;ADAM17;ADAM8;ADIPOQ;ADORA1;ADORA2A;ADORA2B;<br>ADORA3;ADRA1A;ADRA1B;ADRA1D;ADRA2A;ADRA2B;ADRA2C;ADRB1;ADRB2;ADRB3;<br>ADRBK1;AGER;AGRN;AGTR1;AGTR2;AGTRAP;AHR;AKAP13;APOE;AR;<br>ARNT;AVP;AVPR1A;AVPR1B;AVPR2;BAG1;BAZ1B;BCAR1;BDKRB2;BMP2;<br>BMP4;C5;CACNG2;CACNG3;CAV1;CAV3;CCL5;CD36;CD47;CD74;<br>CHKA;CHRM1;CHRM2;CHRM3;CHRM4;CHRM5;CHRNA2;CHRNA3;CHRNA4;CHRNA5;<br>CHRNA6;CHRNA…
MF	GO:0016301	Kinase Activity	1	1.34e-28	6.09e-28	254	2	ABL1;ACVR1;ACVR2A;ADAM17;ADAM8;ADCY3;ADCY5;ADCY6;ADIPOQ;ADK;<br>ADORA1;ADORA2B;ADRA2A;ADRA2B;ADRA2C;ADRB2;ADRBK1;AGT;AK9;AKAP13;<br>AKT1;AKT2;ANAPC2;ANG;ANGPT1;APOE;ATM;AURKA;AVP;BAZ1B;<br>BLM;BMP2;BMP4;C5;CAD;CALCA;CALM3;CAMK2A;CAMK2D;CAMK2G;<br>CARTPT;CAV1;CAV3;CCL5;CCNA2;CCNC;CCND1;CCND3;CCNE1;CCNH;<br>CCNT1;CD74;CDC25B;CDC42;CDK2;CDK5R1;CDK5R2;CDK7;CDK8;CDKN1A;<br>CDKN2A;CHKA;CHRM1;CHRNA3;CHR…
MF	GO:0000988	Transcription Factor Activity, Protein Binding	1	1.73e-25	7.41e-25	122	2.7	ACTL6A;ARID1A;ARNT;ASCL1;BATF3;BRCA1;CCNE1;CDK7;CITED1;COPS5;<br>CREBBP;CRYM;CTNNB1;DDX5;DDX54;DNMT3B;EP300;ESR2;FHL2;FOXP3;<br>GATA3;GRIP1;HDAC1;HDAC9;HIPK2;HMGA2;HR;ISL1;JUN;JUNB;<br>KAT5;KLF4;LDB1;MED1;MED10;MED12;MED13;MED14;MED16;MED17;<br>MED20;MED21;MED23;MED24;MED6;MED7;MMS19;MTA2;MYOD1;NCOA2;<br>NCOA3;NCOA4;NCOA6;NCOR1;NCOR2;NEUROD2;NFIB;NFKB2;NKX3-1;NMI;<br>NR0B1;NR0B2;NR1D1;NR1H3;NR1H4…
MF	GO:0008134	Transcription Factor Binding	1	1.72e-21	6.72e-21	101	2.7	AHR;AR;ARNT;ARRB1;ASCL1;BAZ1B;BCL2;CDKN2A;CEBPA;CEBPB;<br>CREBBP;CSNK2B;CTNNB1;DNAJA3;DNMT1;EP300;ESR1;FLNA;FOXA1;FOXL2;<br>FOXO1;FOXO3;FOXO4;FOXP3;GABBR1;GATA3;GSK3B;GTF2B;HDAC1;HDAC2;<br>HDAC9;HIF1A;HMGA2;HMGB1;HMGN3;HNF4A;HR;HTT;ISL1;JUN;<br>KAT5;KLF4;LEF1;MAPK1;MAPK9;MED1;MED12;MED13;MED14;MED16;<br>MED17;MED24;MEF2C;MTA2;MTOR;MYOD1;NCOA3;NCOA6;NCOR1;NFKBIA;<br>NKX3-1;NR0B1;NR0B2;NR1H2;NR1H3;…
MF	GO:0001071	Nucleic Acid Binding Transcription Factor Activity	1	5.38e-19	2.05e-18	216	1.8	ADAM8;AGER;AGT;AHR;AKT1;AR;ARHGEF2;ARNT;ARRB1;ARRB2;<br>ARX;ASCL1;ATOH1;BARX1;BATF3;BCL11B;CAMK2A;CBFA2T3;CDKN2A;CEBPA;<br>CEBPB;CERS2;CHUK;CITED1;CREBBP;CTNNB1;CTNNBIP1;DAB2IP;DDR2;DNAJA3;<br>EDA;EGR1;EP300;ESR1;ESR2;ESRRA;ESRRG;FER;FLNA;FOS;<br>FOXA1;FOXL2;FOXO1;FOXO3;FOXO4;FOXP3;GATA3;GFI1;GLI3;HDAC1;<br>HDAC2;HIF1A;HMGA2;HMGB1;HMGB2;HMGN3;HMOX1;HNF1B;HNF4A;HOXA5;<br>HR;ICAM1;IKBKB;IL10;IL1B;I…
MF	GO:0016829	Lyase Activity	1	1.78e-18	6.62e-18	78	2.9	ACMSD;ADCY3;ADCY5;ADCY6;ADORA1;ADORA2A;ADORA2B;ADORA3;ADRA2A;ADRB1;<br>ADRB2;ADRB3;ALAD;APEX2;APIP;APLP1;AVPR2;CA2;CA7;CALCA;<br>CHRM4;CHRM5;CRHR1;DDC;DRD1;DRD2;DRD3;DRD4;DRD5;EDNRA;<br>FECH;FLNA;FTCD;GABBR1;GABBR2;GGCX;GHRH;GLDC;GLO1;GLUL;<br>GNAI1;GNAS;GPT;GRM7;GUCY1B3;HACD1;HMGA2;HTR1A;HTR4;HTR7;<br>LHCGR;MLYCD;NOS3;NPR1;NPR2;NTRK1;NTRK2;OAZ1;OAZ2;OAZ3;<br>OPRD1;OPRK1;OPRL1;OPRM1;P2RY1;PAICS;P…
MF	GO:0008289	Lipid Binding	1	1.31e-14	3.84e-14	105	2.2	ABCA1;ABCG1;ADAP2;ADH4;ADH7;AKR1C1;AKR1C2;AKR1D1;AKT1;ALDH1A1;<br>ALDH1A2;ALOX5AP;ANXA1;APOA1;APOA2;APOE;AR;BAX;CALB1;CAV1;<br>CD36;CDK5R2;CRP;CYP11A1;CYP21A2;CYP3A4;DGKA;EEA1;ESR1;ESR2;<br>ESRRA;ESRRG;F10;F3;FABP2;FABP3;FABP6;FER;FFAR1;GC;<br>GPER1;HNF4A;HSD11B2;IRX5;ITPR1;ITPR2;ITPR3;KL;LANCL2;MAP3K1;<br>MTTP;NCF1;NCF4;NOXO1;NR1H3;NR3C1;NR3C2;OPN4;OSBPL8;OTC;<br>OXER1;PGR;PGRMC1;PIK3R1;PLA2G1B;…
MF	GO:0016810	Hydrolase Activity, Acting On Carbon-Nitrogen (But Not Peptide) Bonds	1	2e-05	4.02e-05	28	2.3	ACY1;ACY3;ADA;AMPD3;ARG1;ARG2;ASPA;ASRGL1;ATIC;CAD;<br>CECR1;DARS;DPYS;GBA;GBA2;HDAC1;HDAC2;HDAC9;LCT;MTA2;<br>MTHFD1;MTHFD2;NCOR1;PADI2;PADI4;SIRT1;SIRT2;TP53;
MF	GO:0008168	Methyltransferase Activity	1	0.00292	0.00497	32	1.7	ALDH1L1;AMT;ASH2L;ASMT;COMT;DMGDH;DNMT1;DNMT3A;DNMT3B;GAMT;<br>GART;GCSH;GNMT;KMT2A;KMT2D;LCMT1;LCMT2;LRTOMT;MGMT;MTFMT;<br>MTR;NNMT;NSD1;PRDM2;PRMT1;PRMT2;RBBP5;SHMT2;TPMT;TRDMT1;<br>TYMS;WDR5;
MF	GO:0016874	Ligase Activity	1	0.00707	0.0115	75	1.3	8-Mar;AARS;AARS2;ACACA;ACACB;ACSL1;ACSL3;ACSL4;ADSS;ADSSL1;<br>ANAPC2;ASNS;ASS1;BRCA1;CAD;CDC20;CDK2;CDKN2A;CTPS1;DARS;<br>DARS2;FPGS;GARS;GART;GLUL;GSS;HLCS;IARS;IARS2;KARS;<br>LARS;LARS2;LIG4;MAP3K1;MCCC1;MCCC2;MDM2;MTHFD1;NARS;NARS2;<br>NEDD4;NFX1;PAICS;PARK2;PC;PCCA;PCCB;PIAS1;PIAS2;PIAS3;<br>PSMB9;PSMC5;PTEN;RAG1;RLIM;RNF14;RNF4;STUB1;SUMO1;TNFAIP3;<br>TRIM24;TRIM25;TRIM28;UBC;UBE2B;UBE2I;UB…
MF	GO:0016887	ATPase Activity	1	0.00739	0.0118	55	1.4	ABCA1;ABCC2;ABCC4;ABCC9;ABCG1;ACIN1;ATAD2;ATP11C;ATP13A2;ATP1A1;<br>ATP1A2;ATP1A3;ATP2A1;ATP2B4;ATP4A;ATP5E;ATP8A2;ATP8B1;BLM;CCNH;<br>CDK7;CETN1;CETN2;CFTR;CHD1;DDX17;DDX5;DDX52;DDX54;DYNC1H1;<br>FGF10;GABARAPL2;GTF2H1;HELB;HSP90AA1;HSPA5;HSPD1;LONP1;MNAT1;PLN;<br>PSMC5;RAB3A;RAD51;SMARCA2;SMARCA4;TAP1;TNNC1;TOP1;TOP1MT;TOP2A;<br>TOP2B;TPM1;VCP;WRN;XRCC6;
MF	GO:0043167	Ion Binding	1	0.00872	0.0138	449	1.1	8-Mar;AARS;AARS2;ABL1;ACACA;ACACB;ACE;ACE2;ACMSD;ACTN2;<br>ACTN3;ACVR1;ACVR2A;ACY1;ACY3;ADA;ADAM17;ADAM8;ADAMTS20;ADAMTS9;<br>ADAP1;ADAP2;ADCY3;ADCY5;ADCY6;ADH1A;ADH1B;ADH1C;ADH4;ADH7;<br>ADI1;ADK;ADSS;ADSSL1;AIF1;AKAP13;ALAD;ALOX15;ALOX15B;ALOX5;<br>AMPD3;ANG;ANXA1;AOC1;AOC2;AOC3;APEX2;APIP;APLP1;APOA2;<br>APOE;AR;ARG1;ARG2;ARHGAP29;ARHGEF2;ASH2L;ASPA;ASPH;ATP11C;<br>ATP13A2;ATP1A1;ATP1A2;ATP1A3…
MF	GO:0030674	Protein Binding, Bridging	1	0.0171	0.0263	21	1.6	ADAP2;ANXA1;BICD1;FGA;FKBP4;GRB2;HSH2D;HSPA5;KHDRBS1;MMS19;<br>NCK1;NCK2;PRKAA2;SHC1;SORBS1;SRC;STAP1;STUB1;STX1A;TIRAP;<br>VAV3;
MF	GO:0030234	Enzyme Regulator Activity	1	0.0224	0.0336	115	1.2	ADAP1;ADAP2;AGT;AGTR1;AKAP13;AKT1;ALDH1A1;ALOX5AP;ANXA1;APOA1;<br>APOA2;APOE;ARFGEF2;ARHGAP29;ARHGEF15;ARHGEF2;ARRB1;AVP;BMP2;C5;<br>CABP1;CAV1;CCL5;CCND1;CCNE1;CDK5R1;CDK5R2;CDKN1A;CDKN2A;CHRM4;<br>CSNK2A1;CSNK2B;DAB2IP;DGKI;DNAJA3;DNAJC3;DOCK4;DOCK5;DYNLL1;EGFR;<br>EPO;ESR1;FBLN1;FFAR1;FOXL2;FURIN;GDPGP1;GHRL;GNA15;GNAI1;<br>GNAS;GRM7;GSTP1;HEXIM1;HMGB1;HSP90AA1;HSP90AB1;HSPA5;HTR2B;IGF2;<br>JU…
MF	GO:0016791	Phosphatase Activity	1	0.0252	0.0374	46	1.3	ACP1;AGTR2;ATP1A1;BMP2;CAMK2G;CDC25B;CSNK2A1;DRD2;ENOPH1;FBP1;<br>FKBP1A;FKBP1B;HACD1;HTT;IFNG;IMPA1;IMPA2;LCK;MAP2K1;MEF2C;<br>NCKAP1L;NT5C1A;NT5E;NT5M;PDGFRB;PDXP;PPARGC1B;PPP1CA;PPP1CC;PPP1R1B;<br>PPP1R9B;PPP2CA;PPP2CB;PPP3CA;PPP3CB;PPP3R1;PPP5C;PTEN;PTPN1;PTPN2;<br>PTPN6;PTPRO;SMAD3;TGFB2;TIGAR;ZEB2;
MF	GO:0016853	Isomerase Activity	1	0.028	0.0412	22	1.5	DCT;DHRS9;ENOPH1;FKBP1A;FKBP1B;FKBP4;FKBP5;MIF;MRI1;MUT;<br>NOD2;P4HB;PPID;PTGES3;PTGIS;SIGMAR1;TOP1;TOP1MT;TOP2A;TOP2B;<br>TOP3A;TOP3B;
MF	GO:0032182	Ubiquitin-Like Protein Binding	1	0.0337	0.0488	10	1.9	CXCR4;NEDD4;PML;RNF4;SIRT2;TNFAIP3;TOP2A;UBR5;UCHL1;VCP;<br>
	GO:0016746	Transferase Activity, Transferring Acyl Groups	1	0.112	0.152	30	1.3	ABHD5;ACSL3;AGT;AGTR1;ALAS1;ALAS2;APOA1;APOA2;APOE;BAAT;<br>CERS2;CHAT;CREBBP;ELOVL4;EP300;GCAT;GLYAT;GLYATL1;GLYATL2;KAT5;<br>LRAT;MED24;NAT10;NCOA2;NCOA3;SMARCE1;SOAT1;SOAT2;TADA3;TAF10;<br>
MF	GO:0042393	Histone Binding	1	0.126	0.17	13	1.4	BAZ1B;CHD1;GLYR1;KMT2A;LEF1;PRKCB;RAG1;RAG2;RBBP5;SIRT1;<br>SMARCA4;SNCA;TRIM24;
MF	GO:0003677	DNA Binding	1	0.249	0.328	250	1	ABL1;AHR;ANG;ANXA1;APEX2;AR;ARID1A;ARNT;ARRB1;ARX;<br>ASCL1;ASH2L;ATM;ATOH1;BARX1;BATF3;BCL11B;BCL2;BLM;BRCA1;<br>CALR;CCNT1;CDKN2A;CEBPA;CEBPB;CERS2;CHD1;CHD9;CITED1;CSNK2B;<br>CTNNB1;CTNNBIP1;CXXC5;DLX5;DNMT1;DNMT3A;DNMT3B;EGFR;EGR1;EP300;<br>ESR1;ESR2;ESRRA;ESRRG;FEZF2;FOS;FOXA1;FOXL2;FOXO1;FOXO3;<br>FOXO4;FOXP3;GATA3;GFI1;GLI3;GLYR1;GTF2B;HDAC1;HDAC2;HIF1A;<br>HIPK2;HIST2H2AB;HMGA2;HMGB1;HMGB…
MF	GO:0004386	Helicase Activity	1	0.326	0.411	18	1.1	BLM;CETN1;CETN2;CHD1;CHD9;DDX17;DDX5;DDX52;DDX54;HELB;<br>MCM3;NAV2;SIRT1;SMARCA2;SMARCA4;TP53;WRN;XRCC6;
MF	GO:0016779	Nucleotidyltransferase Activity	1	0.693	0.831	12	0.9	ABL1;GDPGP1;MED20;MED21;PML;POLA1;POLA2;POLB;POLR1B;POLR2D;<br>PPARG;PTGES3;
MF	GO:0008092	Cytoskeletal Protein Binding	1	0.699	0.831	54	0.9	ABL1;ACE;ACTA1;ACTN2;ACTN3;AIF1;ANG;APOE;AQP2;ARFGEF2;<br>ARHGEF2;B4GALT1;BICD1;BRCA1;CALM3;CXCR4;DIAPH3;DMTN;EGFR;EZR;<br>FER;FKBP4;FLII;FLNA;FNTA;GABARAP;GABARAPL1;GABARAPL2;GC;HTT;<br>KCNMA1;KLHL3;LRRK2;MSN;NCK1;NCK2;NOS3;PAWR;PKD2;POLB;<br>PPP1R9B;RAB11FIP5;RHOA;SCNN1A;SDC4;SLC6A4;SNCA;SNTG2;SORBS1;STX1A;<br>SVIL;TNNC1;TPM1;YWHAH;
MF	GO:0016798	Hydrolase Activity, Acting On Glycosyl Bonds	1	0.701	0.831	10	0.9	GAA;GBA;GBA2;HYAL2;KL;LCT;LYZ;MPG;SMPD1;TDG;<br>
MF	GO:0008233	Peptidase Activity	1	0.76	0.892	83	0.9	ACE;ACE2;ACY1;ADAM17;ADAM8;ADAMTS20;ADAMTS9;AGT;AKT1;AKT2;<br>AVP;BAX;C5;CAV1;CDKN2A;COPS5;CTSG;CTSH;DNAJA3;ELANE;<br>F10;F12;F2;F2R;F3;F7;F9;FADD;FAS;FASLG;<br>FBLN1;FOXL2;FURIN;GGH;HMGB1;HPN;HSPA5;HSPD1;IFI6;IL6;<br>LCK;LEF1;LONP1;MGMT;MMP28;NKX3-1;P2RX1;PAX2;PCSK6;PLAT;<br>PML;POR;PPARG;PRCP;PROC;PROS1;PROZ;PRSS12;PSMB9;RAG1;<br>RBP3;REN;REST;RIPK1;RPS6KA1;RPS6KA3;SERPINB3;SERPINB7;SERPINE1;SE…
MF	GO:0051082	Unfolded Protein Binding	1	0.765	0.892	11	0.8	CALR;CHAF1A;CLN3;DNAJA3;DNAJB9;DNAJC3;HSP90AA1;HSP90AB1;HSPA5;HSPD1;<br>PTGES3;
MF	GO:0016765	Transferase Activity, Transferring Alkyl Or Aryl (Other Than Methyl) Groups	1	0.787	0.909	4	0.8	FNTA;GSTP1;MMAB;UBIAD1;
MF	GO:0008565	Protein Transporter Activity	1	0.798	0.915	7	0.8	ABCG1;AP3D1;KPNA2;KPNA3;LRP2;MCL1;VTI1A;
MF	GO:0016757	Transferase Activity, Transferring Glycosyl Groups	1	0.84	0.955	23	0.8	ADIPOQ;APRT;B4GALT1;GALNT6;GDPGP1;GSK3A;GSK3B;HPRT1;IGF2;MTAP;<br>NAMPT;NAPRT;PARP10;PNP;PPAT;PYGB;PYGL;PYGM;QPRT;TYMP;<br>UGCG;UGT3A2;UGT8;
MF	GO:0003924	GTPase Activity	1	0.865	0.976	64	0.9	ADAP1;ADAP2;ADCY3;ADCY5;ADCY6;AKAP13;ALDH1A1;ARFGEF2;ARHGAP29;ARHGEF15;<br>ARHGEF2;ARRB1;CDC42;CHRM4;CXCL13;DAB2IP;DGKI;DNAJA3;DNM3;DOCK4;<br>DOCK5;FFAR1;GDPGP1;GNA15;GNAI1;GNAS;GNAT1;GNAT3;GNB5;GSK3B;<br>HTR2B;JUN;LRRK2;MAP2K1;MCF2L2;MTOR;NCF1;NCKAP1L;P2RY12;PLCB1;<br>PTGIR;PTK2B;RAB1A;RAB3A;RAB3B;RAB7A;RAB8B;RAC1;RAC2;RAC3;<br>RAPGEF2;RGS2;RGS3;RHOA;SCRIB;SIPA1;SOS1;SPRY1;SPRY2;TSC2;<br>TUBA1B;…
MF	GO:0004518	Nuclease Activity	1	0.913	1	13	0.7	ANG;APEX2;HMGB2;HSPA5;RAG1;RAG2;REXO4;RNASE1;RNASE2;RNASE4;<br>RNASE8;SIRT1;WRN;
MF	GO:0019843	RRNA Binding	1	0.958	1	1	0.3	ANG;
MF	GO:0003729	MRNA Binding	1	0.965	1	5	0.5	CALR;CRYZ;DHFRL1;SYNCRIP;YBX3;
MF	GO:0008135	Translation Factor Activity, RNA Binding	1	0.995	1	3	0.3	COPS5;EIF3I;GTF2B;
MF	GO:0003723	RNA Binding	1	1	1	47	0.5	AARS;AARS2;ANG;ANXA1;ATXN1;BRCA1;CALR;CCNT1;COPS5;CRYZ;<br>DARS2;DDX17;DDX52;DDX54;DHFRL1;EIF3I;GTF2B;HEXIM1;KARS;KHDRBS1;<br>LONP1;LSM8;MEF2C;NCBP2;NR0B1;PPARGC1A;PPARGC1B;PRKCSH;RBFOX2;RBM23;<br>RBM39;RPL31;SAFB;SAFB2;SPI1;SYNCRIP;TLR3;TLR7;TLR8;TLR9;<br>TRDMT1;UBR5;WT1;YARS;YARS2;YBX1;YBX3;
MF	GO:0005198	Structural Molecule Activity	1	1	1	38	0.6	ACTA1;ACTG1;ACTN2;ACTN3;AGRN;AMELX;ANXA1;ASPH;BAZ1B;BGLAP;<br>BICD1;CAV1;CAV3;CLDN5;COL1A1;COL5A1;CTNNB1;FBLN1;GRIP1;HCN2;<br>KLHL3;LAMA3;MGP;MIP;MMS19;MSN;NCK1;NCK2;NEFL;ROCK2;<br>RPL31;SHANK3;SMARCD1;STATH;TPM1;TUBA1B;TUBB;WNT4;
MF	GO:0003735	Structural Constituent Of Ribosome	1	1	1	1	0.1	RPL31;
	GO:0005575	Cellular_component	1	1	1	1598	1	8-Mar;AARS;AARS2;ABAT;ABCA1;ABCC2;ABCC4;ABCC9;ABCG1;ABHD5;<br>ABL1;ACACA;ACACB;ACADSB;ACE;ACE2;ACHE;ACIN1;ACMSD;ACP1;<br>ACSL1;ACSL3;ACSL4;ACTA1;ACTG1;ACTL6A;ACTN2;ACTN3;ACVR1;ACVR2A;<br>ACY1;ACY3;ADA;ADAM17;ADAM8;ADAMTS20;ADAMTS9;ADAP1;ADAP2;ADCY3;<br>ADCY5;ADCY6;ADH1A;ADH1B;ADH1C;ADH4;ADH7;ADI1;ADIPOQ;ADIRF;<br>ADK;ADORA1;ADORA2A;ADORA2B;ADORA3;ADRA1A;ADRA1B;ADRA1D;ADRA2A;ADRA2B;<br>ADRA2C;ADRB…
CC	GO:0005886	Plasma Membrane	1	5.86e-50	5.51e-49	647	1.7	ABCA1;ABCC2;ABCC4;ABCC9;ABCG1;ACE;ACE2;ACHE;ACP1;ACTL6A;<br>ACTN2;ACTN3;ACVR1;ACVR2A;ACY3;ADA;ADAM17;ADAM8;ADAP1;ADAP2;<br>ADCY3;ADCY5;ADCY6;ADI1;ADORA1;ADORA2A;ADORA2B;ADORA3;ADRA1A;ADRA1B;<br>ADRA1D;ADRA2A;ADRA2B;ADRA2C;ADRB1;ADRB2;ADRB3;ADRBK1;ADSS;AGER;<br>AGTR1;AGTR2;AIF1;AKT1;AKT2;ALOX5;AMICA1;ANGPT1;ANK2;ANK3;<br>ANXA1;AOC2;AOC3;APLP1;APOA1;APOE;AQP1;AQP2;AQP8;ARHGEF2;<br>ARRB1;ARRB2;ATP11…
CC	GO:0005829	Cytosol	1	8.97e-42	6.32e-41	397	1.9	AARS;ABHD5;ABL1;ACACA;ACACB;ACIN1;ACMSD;ACTA1;ACTG1;ACTN2;<br>ACTN3;ACY1;ADA;ADH1A;ADH1B;ADH1C;ADH4;ADH7;ADI1;ADK;<br>ADRBK1;ADSS;ADSSL1;AHCY;AHR;AIF1;AKAP13;AKR1C1;AKR1C4;AKR1D1;<br>AKT1;AKT2;ALAD;ALDH1A1;ALDH1A2;ALDH3A1;ALDH7A1;ALOX15;ALOX5;AMPD3;<br>ANAPC2;ANK2;APIP;APRT;ARFGEF2;ARG1;ARHGAP29;ARHGEF2;ARRB1;ARRB2;<br>ASMT;ASNS;ASS1;ATIC;AURKA;AVP;BAAT;BAG1;BAX;BCAR1;<br>BCAT1;BCL2;BCL2L1;BICD1;…
CC	GO:0005737	Cytoplasm	1	2.89e-36	1.63e-35	1048	1.3	8-Mar;AARS;AARS2;ABAT;ABCA1;ABCC4;ABCG1;ABHD5;ABL1;ACACA;<br>ACACB;ACADSB;ACE;ACHE;ACIN1;ACMSD;ACP1;ACSL1;ACSL3;ACSL4;<br>ACTA1;ACTG1;ACTN2;ACTN3;ACVR2A;ACY1;ACY3;ADA;ADAM17;ADAM8;<br>ADAP1;ADAP2;ADCY3;ADCY5;ADCY6;ADH1A;ADH1B;ADH1C;ADH4;ADH7;<br>ADI1;ADIPOQ;ADK;ADORA1;ADRA2A;ADRA2C;ADRB1;ADRB2;ADRBK1;ADSS;<br>ADSSL1;AGER;AGT;AGTRAP;AGXT;AGXT2;AHCY;AHCYL1;AHR;AIF1;<br>AKAP13;AKR1B10;AKR1C1;AKR1C2;…
CC	GO:0043234	Protein Complex	1	5.51e-33	2.88e-32	474	1.6	ABAT;ABCC9;ACTA1;ACTG1;ACTL6A;ACTN2;ACTN3;ACVR1;ACVR2A;ADAM8;<br>ADRA2A;ADRB2;ADRB3;AHR;AIF1;ANAPC2;ANG;ANO9;ANXA1;AP3D1;<br>APOE;AQP2;ARHGEF2;ARID1A;ARNT;ARRB1;ASH2L;ATP1A1;ATP1A2;ATP1A3;<br>ATP2A1;ATP5E;ATXN1;AURKA;BAX;BAZ1B;BCL2;BCL2L1;BICD1;BMP2;<br>BRCA1;C5;CACNA1A;CACNA1B;CACNA1C;CACNA1D;CACNA1F;CACNA1G;CACNA1H;CACNA1S;<br>CACNA2D1;CACNA2D2;CACNB1;CACNB2;CACNB3;CACNB4;CACNG1;CACNG2;CACNG3;C…
CC	GO:0005654	Nucleoplasm	1	3.11e-25	1.29e-24	251	1.9	ACTL6A;AHR;AKT1;AKT2;ANAPC2;AR;ARNT;ASH2L;ATM;ATXN1;<br>BLM;BNIP3;BRCA1;CALM3;CAMK2A;CAMK2D;CAMK2G;CBFA2T3;CCNA2;CCNC;<br>CCND1;CCNE1;CCNH;CCNT1;CDC20;CDC25B;CDC45;CDK2;CDK7;CDK8;<br>CDKN1A;CDKN2A;CEBPA;CHD9;CREBBP;CSNK2A1;CTNNB1;CTR9;DUT;EGR1;<br>ELL3;EP300;ESR1;ESR2;ESRRA;ESRRG;FHL2;FOS;FOXA1;FOXL2;<br>FOXO1;FOXO3;FOXO4;FOXP3;GATA3;GFI1;GINS2;GINS4;GLI3;GTF2B;<br>GTF2H1;HDAC1;HDAC2;HDAC9;HIF1A;…
CC	GO:0016023	Cytoplasmic Membrane-Bounded Vesicle	1	1.24e-17	4.27e-17	147	2	8-Mar;ABCA1;ABCC4;ACTN2;ADA;ADAM8;AGTRAP;AHCY;AKT2;APOA1;<br>AQP2;ARRB1;ARRB2;ATM;ATP1A1;AVP;BDNF;CACNG2;CACNG3;CALR;<br>CALY;CAMK2A;CAMK2D;CAMK2G;CAV1;CAV2;CD36;CD63;CDC42;CFTR;<br>CHGB;CLN3;CTSG;CXCR4;CYBA;CYP19A1;DAB2;DBH;DCT;DDC;<br>DLG4;DRD2;DRD3;DTNBP1;EGFR;ELANE;FASLG;FGA;FGFR1;FGFR2;<br>FLOT1;FURIN;GABBR1;GABRA2;GARS;GAS6;GGH;GHRL;GNAS;GPR143;<br>GRIA1;GRIA2;GRIA3;GRIA4;GRIN1;GRIP1;HCRT;H…
CC	GO:0005783	Endoplasmic Reticulum	1	7.8e-17	2.62e-16	194	1.8	ABCG1;ACHE;ACSL1;ACSL3;ACSL4;ADIPOQ;ADORA1;AGTRAP;AHCYL1;ALDH3A1;<br>ALDH3A2;ALOX5AP;APOA1;APOA2;AQP2;ASPH;ASS1;ATP11C;ATP1A3;ATP2A1;<br>ATP8B1;AVPR2;BAX;BCHE;BCL2;BGLAP;CACNA1S;CACNA2D1;CACNB1;CALHM1;<br>CALR;CAMK2D;CAMK2G;CASQ1;CAT;CAV1;CD74;CERS2;CES1;CFTR;<br>CLN3;CRHR2;CRIPAK;CYB5A;CYBA;CYP17A1;CYP19A1;CYP1A1;CYP21A2;CYP2B6;<br>CYP2E1;CYP2R1;CYP3A4;CYP4F11;CYP4F2;DHRS9;DNAJB9;DNAJC3;DRD1;DTN…
CC	GO:0005623	Cell	1	2.02e-15	6.47e-15	1548	1	8-Mar;AARS;AARS2;ABAT;ABCA1;ABCC2;ABCC4;ABCC9;ABCG1;ABHD5;<br>ABL1;ACACA;ACACB;ACADSB;ACE;ACE2;ACHE;ACIN1;ACMSD;ACP1;<br>ACSL1;ACSL3;ACSL4;ACTA1;ACTG1;ACTL6A;ACTN2;ACTN3;ACVR1;ACVR2A;<br>ACY1;ACY3;ADA;ADAM17;ADAM8;ADAP1;ADAP2;ADCY3;ADCY5;ADCY6;<br>ADH1A;ADH1B;ADH1C;ADH4;ADH7;ADI1;ADIPOQ;ADK;ADORA1;ADORA2A;<br>ADORA2B;ADORA3;ADRA1A;ADRA1B;ADRA1D;ADRA2A;ADRA2B;ADRA2C;ADRB1;ADRB2;<br>ADRB3;ADRBK1;AD…
CC	GO:0005622	Intracellular	1	1.55e-14	4.47e-14	1266	1.1	8-Mar;AARS;AARS2;ABAT;ABCA1;ABCC4;ABCG1;ABHD5;ABL1;ACACA;<br>ACACB;ACADSB;ACE;ACHE;ACIN1;ACMSD;ACP1;ACSL1;ACSL3;ACSL4;<br>ACTA1;ACTG1;ACTL6A;ACTN2;ACTN3;ACVR2A;ACY1;ACY3;ADA;ADAM17;<br>ADAM8;ADAP1;ADAP2;ADCY3;ADCY5;ADCY6;ADH1A;ADH1B;ADH1C;ADH4;<br>ADH7;ADI1;ADIPOQ;ADK;ADORA1;ADORA2A;ADRA2A;ADRA2C;ADRB1;ADRB2;<br>ADRB3;ADRBK1;ADSS;ADSSL1;AGER;AGT;AGTRAP;AGXT;AGXT2;AHCY;<br>AHCYL1;AHR;AIF1;AKAP13;A…
CC	GO:0005615	Extracellular Space	1	1.06e-12	2.77e-12	139	1.8	ACE;ACE2;ACHE;ADA;ADAMTS20;ADAMTS9;ADIPOQ;AGER;AGRN;AGT;<br>ANG;ANGPT1;ANXA1;AOC1;APLN;APOA1;APOA2;APOE;ARG1;AVP;<br>BCHE;BGLAP;BMP2;BMP4;BMP5;BMP6;C1QTNF1;C5;CA2;CALCA;<br>CALR;CARTPT;CCL5;CECR1;CFH;CNTF;COL1A1;COLQ;CRHBP;CRLF1;<br>CRP;CSF1;CSF2;CTSG;CXCL13;DKK3;EDN1;EDN2;EGFR;EPO;<br>F12;F2;F3;F7;FASLG;FBLN1;FGA;FGF1;FGF10;FGF23;<br>GAS6;GC;GGH;GHRH;GHRL;HMGB1;HMGB2;HMOX1;HPX;HSPD1;<br>ICAM1;IF…
CC	GO:0005739	Mitochondrion	1	1.59e-10	3.86e-10	202	1.5	AARS2;ABAT;ABL1;ACACA;ACADSB;ACSL1;ACSL3;ACSL4;ADAP2;AGXT;<br>AGXT2;AKT2;ALAS1;ALAS2;ALDH1B1;ALDH1L1;ALDH2;ALDH5A1;ALDH7A1;AMT;<br>ANXA1;APEX2;ARG2;ASS1;ATAD2;ATIC;ATP5E;BAG1;BAX;BCAT2;<br>BCL2;BCL2L1;BNIP3;BRCA1;CASQ1;CAT;CAV1;CBR4;CCS;CDK7;<br>CHAT;CHCHD2;CHDH;CLN3;CMPK2;COMT;COX1;COX2;COX3;COX4I1;<br>COX5A;COX5B;COX6A2;COX6B1;COX6C;COX7A1;COX7B;COX7C;COX8A;CYB5A;<br>CYBA;CYBB;CYP11A1;CYP11B1;C…
CC	GO:0043226	Organelle	1	8.29e-10	1.98e-09	1063	1.1	8-Mar;AARS2;ABAT;ABCA1;ABCC4;ABCG1;ABL1;ACACA;ACACB;ACADSB;<br>ACE;ACHE;ACIN1;ACP1;ACSL1;ACSL3;ACSL4;ACTA1;ACTG1;ACTL6A;<br>ACTN2;ACTN3;ADA;ADAM17;ADAM8;ADAP1;ADAP2;ADCY3;ADCY5;ADCY6;<br>ADH4;ADI1;ADIPOQ;ADK;ADORA1;ADORA2A;ADRA2C;ADRB1;ADRB2;ADRB3;<br>AGTRAP;AGXT;AGXT2;AHCY;AHCYL1;AHR;AIF1;AKAP13;AKT1;AKT2;<br>ALAS1;ALAS2;ALDH1A2;ALDH1B1;ALDH1L1;ALDH2;ALDH3A1;ALDH3A2;ALDH5A1;ALDH7A1;<br>ALOX15;AL…
CC	GO:0000228	Nuclear Chromosome	1	4.81e-07	1.06e-06	49	2.1	ACTL6A;AR;ARID1A;BARX1;BAZ1B;BLM;BRCA1;CEBPB;CSNK2A1;DNMT3A;<br>DNMT3B;FER;GATA3;HDAC1;HDAC2;HELB;HMGA2;JUN;LDB1;MCM3;<br>MYOD1;NCOR1;NR1D1;NR1H3;PLCB1;POLA1;POLA2;RAD51;RARA;RXRA;<br>SIRT1;SMARCA2;SMARCA4;SMARCB1;SMARCD3;SMARCE1;SNAI2;TAL1;TCF3;TOP1;<br>TOP2A;TOP2B;TP53;TRIM24;TRIM28;UBE2B;UBE2I;VDR;XRCC6;
CC	GO:0030312	External Encapsulating Structure	1	8.16e-07	1.77e-06	9	6.7	B4GALT1;GRIN1;GRIN2A;GRIN2B;GRIN2C;GRIN2D;GRIN3A;GRIN3B;P2RX1;
CC	GO:0005768	Endosome	1	0.000129	0.000245	71	1.5	8-Mar;ABCG1;ACE;ADCY5;ADCY6;ADRA2C;ADRB2;AP3D1;APOE;AQP2;<br>ATP1A2;AVPR1A;AVPR1B;AVPR2;BDKRB2;CAV1;CD63;CD74;CDK2;CFTR;<br>CLN3;CRHR1;DTNBP1;EEA1;EGFR;EPHB1;ERBB2;FLOT1;GRB2;HSD17B6;<br>HSPD1;HTR4;HTT;IKBKE;INS;INSR;LAMP1;LAMP2;LDLR;LHCGR;<br>LRAT;LRP2;NGF;NGFR;NOX1;NTRK1;OCA2;PML;PTPN1;RAB11FIP1;<br>RAB11FIP3;RAB11FIP5;RAB7A;RIPK1;SHC1;SLC6A4;SLC9A6;SNX27;SNX3;SORT1;<br>TLR3;TLR7;TLR8;TLR9;TNF;…
CC	GO:0005694	Chromosome	1	0.000251	0.000471	80	1.5	ACTL6A;AR;ARID1A;ARRB1;ATM;BARX1;BAZ1B;BLM;BRCA1;CDK2;<br>CDKN2A;CEBPB;CSNK2A1;DNMT1;DNMT3A;DNMT3B;EP300;FER;GATA3;HDAC1;<br>HDAC2;HELB;HIST2H2AB;HLCS;HMGA2;HMGB1;HMGB2;HMGN3;ITGB3BP;JUN;<br>JUNB;JUND;KLF4;LDB1;LIG4;MCM3;MYOD1;NCOR1;NEDD4;NR1D1;<br>NR1H3;NSD1;PLCB1;POLA1;POLA2;PPP1CC;PPP2CA;PPP2CB;PTGES3;RAD51;<br>RARA;RB1;REST;RXRA;SIRT1;SMARCA2;SMARCA4;SMARCB1;SMARCC1;SMARCD3;<br>SMARCE1;SNAI2;…
CC	GO:0005634	Nucleus	1	0.000518	0.000948	590	1.1	ABL1;ACHE;ACIN1;ACP1;ACTL6A;ACTN2;ADAP1;ADCY3;ADI1;ADK;<br>ADRB1;ADRB2;ADRB3;AHR;AIF1;AKAP13;AKT1;AKT2;ALDH1A2;ALDH1B1;<br>ALDH7A1;ALOX15;ALOX5;ALOX5AP;ANAPC2;ANG;ANXA1;APEX2;APRT;AQP1;<br>AR;ARID1A;ARNT;ARRB1;ARRB2;ARX;ASCL1;ASH2L;ASPA;ASRGL1;<br>ASS1;ATAD2;ATM;ATOH1;ATP1A3;ATXN1;AURKA;BAG1;BARX1;BATF3;<br>BAX;BAZ1B;BCAS2;BCAT2;BCL11B;BCL2;BCL2L1;BLM;BNIP3;BRCA1;<br>BTF3;CABP1;CACNA1A;CAD;CALB1;…
CC	GO:0005764	Lysosome	1	0.000548	0.000991	44	1.7	8-Mar;ADA;ADAM8;ADRB2;AQP2;ARRB1;ASS1;ATP13A2;CAT;CD63;<br>CD74;CLN3;CTSH;FASLG;GAA;GABARAP;GBA;GC;GGH;GOT1;<br>GPR143;HPS4;HYAL2;KCNE2;LAMP1;LAMP2;LDLR;LHCGR;LRP2;MPO;<br>MTOR;NPPA;OCA2;PRCP;RAB7A;RNASE2;SLC36A1;SMPD1;SORT1;STX3;<br>TLR7;TLR9;TYR;UNC93B1;
CC	GO:0005773	Vacuole	1	0.00144	0.00253	49	1.5	8-Mar;ADA;ADAM8;ADRB2;AQP1;AQP2;ARRB1;ASS1;ATP13A2;CAT;<br>CD63;CD74;CLN3;CTSH;FASLG;GAA;GABARAP;GABARAPL1;GABARAPL2;GBA;<br>GC;GGH;GOT1;GPR143;HPS4;HTT;HYAL2;KCNE2;LAMP1;LAMP2;<br>LDLR;LHCGR;LRP2;MPO;MTOR;NPPA;OCA2;PRCP;RAB7A;RNASE2;<br>SLC36A1;SMPD1;SORT1;STX3;TLR7;TLR9;TYR;UNC93B1;WIPI1;
CC	GO:0005777	Peroxisome	1	0.0133	0.0209	18	1.7	ACSL1;ACSL3;ACSL4;AGXT;AOC1;BAAT;CAT;DECR2;DHRS4;EPHX2;<br>FNDC5;HMGCR;MLYCD;NUDT12;PECR;PIPOX;SOD1;TKT;
CC	GO:0005811	Lipid Particle	1	0.0146	0.0226	6	2.9	ABHD5;CAV1;CAV2;HSPA4;PNPLA2;SIGMAR1;
CC	GO:0005794	Golgi Apparatus	1	0.0188	0.0285	117	1.2	ABCA1;ABCG1;ACACB;ACHE;AGTRAP;AP3D1;APLP1;APOE;AQP2;ARFGEF2;<br>ARHGEF2;ARRB1;ATP1A3;AVPR2;B4GALT1;BGLAP;BICD1;CABP1;CALCOCO2;CALR;<br>CASQ1;CAT;CAV1;CAV2;CAV3;CBFA2T3;CD36;CD74;CDC42;CECR1;<br>CLN3;CRHR1;CRHR2;CRYZ;CYBA;DYNC1H1;EGFR;EPHX2;F10;F2;<br>F2R;F2RL1;F7;F9;FGFR2;FLNA;FTCD;FURIN;GABARAP;GABARAPL1;<br>GABARAPL2;GAL3ST1;GALNT6;GAS6;GLUL;GNAS;GPER1;GPR143;GRB2;HTR5A;<br>HTT;INS;KCNA5;KCNJ6;…
CC	GO:0005576	Extracellular Region	1	0.0414	0.0583	223	1.1	ACE;ACE2;ACHE;ACTN2;ADA;ADAMTS20;ADAMTS9;ADIPOQ;AGER;AGRN;<br>AGT;AMELX;ANG;ANGPT1;ANXA1;AOC1;APLN;APLP1;APOA1;APOA2;<br>APOE;AQP1;ARG1;AVP;B4GALT1;BCHE;BDNF;BGLAP;BICD1;BMP2;<br>BMP4;BMP5;BMP6;C1QTNF1;C1QTNF3;C5;CA2;CALCA;CALM3;CALR;<br>CARTPT;CCL5;CD34;CD47;CECR1;CFH;CHGB;CLEC4M;CNTF;COL1A1;<br>COL5A1;COLQ;CRH;CRHBP;CRLF1;CRP;CSF1;CSF2;CTSG;CXCL13;<br>DBH;DDR1;DKK3;DLL1;EDA;EDN1;EDN2;EGFR;ELANE…
CC	GO:0005635	Nuclear Envelope	1	0.0436	0.0608	33	1.4	ABL1;ALOX5;ALOX5AP;AQP1;BCL2;BCL2L1;BNIP3;CERS2;DARS;DHRS2;<br>DHRS4;EDNRA;EGFR;HIPK2;ITPR3;KCNH2;KPNA3;MVP;PML;POLA1;<br>PTGER3;PTGS1;RAC2;RETSAT;SIGMAR1;SIRT1;SLC29A2;SMAD3;SORT1;SREBF1;<br>SULT1E1;SUMO1;TUBB;
	GO:0008150	Biological_process	1	1	1	1588	1	8-Mar;AARS;AARS2;ABAT;ABCA1;ABCC2;ABCC4;ABCC9;ABCG1;ABHD5;<br>ABL1;ACACA;ACACB;ACADSB;ACE;ACE2;ACHE;ACIN1;ACMSD;ACP1;<br>ACSL1;ACSL3;ACSL4;ACTA1;ACTG1;ACTL6A;ACTN2;ACTN3;ACVR1;ACVR2A;<br>ACY1;ACY3;ADA;ADAM17;ADAM8;ADAMTS20;ADAMTS9;ADAP1;ADAP2;ADCY3;<br>ADCY5;ADCY6;ADH1A;ADH1B;ADH1C;ADH4;ADH7;ADI1;ADIPOQ;ADIRF;<br>ADK;ADORA1;ADORA2A;ADORA2B;ADORA3;ADRA1A;ADRA1B;ADRA1D;ADRA2A;ADRA2B;<br>ADRA2C;ADRB…
BP	GO:0007267	Cell-Cell Signaling	1	4.58e-104	6.46e-102	350	3.3	ABAT;ACHE;ACTN2;ACVR2A;ADCY3;ADCY5;ADCY6;ADIPOQ;ADORA1;ADORA2A;<br>ADRA1A;ADRA1B;ADRA1D;ADRA2A;ADRA2B;ADRA2C;ADRB1;ADRB2;AGRN;AGT;<br>ALDH2;ALDH5A1;ANAPC2;ANXA1;APLN;APOE;AR;ARHGEF15;ARRB2;ATP1A2;<br>ATXN1;AVP;AVPR1A;AVPR1B;BARX1;BAZ1B;BCHE;BDNF;BMP2;BMP4;<br>C5;CACNA1A;CACNA1B;CACNA1C;CACNA1D;CACNA1G;CACNA2D2;CACNB2;CACNB3;CACNB4;<br>CACNG2;CACNG3;CALB1;CALCA;CALM3;CAMK2A;CAMK2D;CAMK2G;CARTPT;CA…
BP	GO:0006950	Response To Stress	1	4.25e-73	3e-71	555	2	AARS;ABAT;ABCC4;ABCC9;ABL1;ACE;ACE2;ACHE;ACTG1;ACTL6A;<br>ACTN2;ACVR1;ADA;ADAM17;ADAM8;ADIPOQ;ADORA1;ADORA2A;ADORA2B;ADORA3;<br>ADRA1A;ADRA2A;ADRA2B;ADRA2C;ADRB1;ADRB2;ADRB3;ADRBK1;AGER;AGT;<br>AGTR1;AGTRAP;AHR;AIF1;AKT1;AKT2;ALAS2;ALDH3A1;ALOX15;ALOX5;<br>ALOX5AP;AMICA1;ANG;ANGPT1;ANXA1;AOC3;APEX2;APOA1;APOA2;APOE;<br>AQP1;AQP2;ARG1;ARG2;ARNT;ARRB1;ARRB2;ASH2L;ASNS;ASS1;<br>ATM;ATP2A1;ATP2B4;AVP…
BP	GO:0006810	Transport	1	3.11e-72	1.46e-70	651	1.9	ABAT;ABCA1;ABCC2;ABCC4;ABCC9;ABCG1;ABL1;ACACB;ACE;ACHE;<br>ACTN2;ACVR2A;ADA;ADAM8;ADCY3;ADCY5;ADCY6;ADIPOQ;ADORA1;ADORA2A;<br>ADORA2B;ADRA1A;ADRA2A;ADRA2B;ADRA2C;ADRB1;ADRB2;ADRBK1;AGT;AGTR1;<br>AGXT;AHCYL1;AKR1C1;AKR1C4;AKT1;AKT2;ALDH1L1;ALDH5A1;AMICA1;ANG;<br>ANGPT1;ANO9;ANXA1;AP3D1;APLN;APLP1;APOA1;APOA2;APOE;APRT;<br>AQP1;AQP2;AQP8;AR;ARFGEF2;ARG1;ARG2;ARHGEF2;ARRB1;ARRB2;<br>ATP11C;ATP13A2;A…
BP	GO:0044281	Small Molecule Metabolic Process	1	1.07e-70	3.78e-69	583	1.9	AARS;AARS2;ABAT;ABCA1;ABCC2;ABCC4;ABCC9;ABCG1;ABHD5;ACACA;<br>ACACB;ACADSB;ACHE;ACIN1;ACMSD;ACSL1;ACSL3;ACSL4;ACY1;ADA;<br>ADAP1;ADAP2;ADCY3;ADCY5;ADCY6;ADH1A;ADH1B;ADH1C;ADH4;ADH7;<br>ADI1;ADIPOQ;ADK;ADORA1;ADORA2A;ADORA2B;ADORA3;ADRA1B;ADRA2A;ADRB1;<br>ADRB2;ADRB3;ADSS;ADSSL1;AGT;AGXT;AGXT2;AHCY;AHCYL1;AKAP13;<br>AKR1C1;AKR1C2;AKR1C3;AKR1C4;AKR1D1;AKT1;AKT2;ALDH1A1;ALDH1A2;ALDH1A3;<br>ALDH1L1;A…
BP	GO:0042592	Homeostatic Process	1	6.69e-68	1.89e-66	296	2.8	ABCA1;ABCG1;ACACA;ACIN1;ACVR2A;ADA;ADAM17;ADAM8;ADIPOQ;ADORA1;<br>ADRA1A;ADRA1B;ADRA2A;ADRB1;ADRB2;AGER;AGT;AGTR1;AKR1C1;AKT1;<br>ALAS2;AMELX;ANG;AP3D1;APLN;APOA1;APOA2;APOE;AQP1;AQP2;<br>ARNT;ASPA;ATP1A2;ATP2A1;ATP4A;ATXN1;AVP;AVPR1A;AVPR1B;AVPR2;<br>BAX;BCL2;BCL2L1;BDKRB2;BGLAP;BMP4;BNIP3;C5;CA2;CACNA1A;<br>CACNA1B;CACNA1C;CACNA1F;CACNA1G;CACNB3;CACNB4;CACNG2;CALCA;CALM3;CALR;<br>CAMK2D;CARTPT;…
BP	GO:0008283	Cell Proliferation	1	1.64e-67	3.86e-66	349	2.5	ACE;ACE2;ACHE;ACVR2A;ADA;ADAM17;ADIPOQ;ADK;ADORA1;ADORA2B;<br>ADRA1A;ADRA1B;ADRA1D;ADRA2A;ADRB2;AGER;AGT;AGTR1;AHR;AIF1;<br>AKT1;ALDH1A2;ALDH3A1;ALOX15B;AMELX;ANG;ANGPT1;ANXA1;APLN;APOA1;<br>APOE;AQP1;AR;ARG1;ARHGEF2;ARNT;ARX;ASCL1;ASH2L;ASPH;<br>ATM;ATP8A2;AVP;AVPR1A;AVPR2;B4GALT1;BCAR1;BCAT1;BCL11B;BCL2;<br>BCL2L1;BDNF;BLM;BMP2;BMP4;BMP6;BRCA1;CALCA;CALR;CAV1;<br>CAV2;CBFA2T3;CCL5;CCND1;CCND3;C…
BP	GO:0055085	Transmembrane Transport	1	1.92e-64	3.87e-63	332	2.5	ABCA1;ABCC2;ABCC4;ABCC9;ABCG1;ACACB;ADCY3;ADCY5;ADCY6;ADRA2A;<br>ADRB1;ADRB2;AGT;AHCYL1;AKR1C4;AKT1;AKT2;ANO9;APOA1;APOA2;<br>AQP1;AQP2;AQP8;ATP11C;ATP13A2;ATP1A1;ATP1A2;ATP1A3;ATP2A1;ATP2B4;<br>ATP4A;ATP5E;ATP8A2;ATP8B1;AVP;AVPR2;BAX;BCL2;BMP4;CACNA1A;<br>CACNA1B;CACNA1C;CACNA1D;CACNA1F;CACNA1G;CACNA1H;CACNA1S;CACNA2D1;CACNA2D2;CACNB1;<br>CACNB2;CACNB3;CACNB4;CACNG1;CACNG2;CACNG3;CALHM1;CALM3;CA…
BP	GO:0009058	Biosynthetic Process	1	6.32e-59	9.91e-58	796	1.6	8-Mar;AARS;AARS2;ABCA1;ABCG1;ABHD5;ABL1;ACACA;ACACB;ACE2;<br>ACHE;ACSL1;ACSL3;ACSL4;ACTL6A;ACVR1;ADA;ADAM8;ADCY3;ADCY5;<br>ADCY6;ADH1A;ADI1;ADIPOQ;ADK;ADORA1;ADORA2A;ADORA2B;ADORA3;ADRA2A;<br>ADRB1;ADRB2;ADRB3;ADSS;ADSSL1;AGER;AGRN;AGT;AGTR2;AGXT;<br>AHR;AIF1;AKR1C4;AKR1D1;AKT1;AKT2;ALAD;ALAS1;ALAS2;ALDH1A2;<br>ALDH1A3;ALDH1L1;ALDH2;ALDH8A1;ALOX15;ALOX15B;ALOX5;ALOX5AP;AMELX;AMPD3;<br>ANG;ANGPT1;…
BP	GO:0048856	Anatomical Structure Development	1	8.14e-59	1.15e-57	631	1.8	AARS;ABL1;ACE;ACHE;ACIN1;ACSL3;ACSL4;ACTA1;ACTG1;ACTL6A;<br>ACVR1;ACVR2A;ADA;ADAM17;ADAM8;ADAP2;ADIPOQ;ADORA1;ADORA2A;ADORA2B;<br>ADRA1B;ADRA2B;ADRA2C;ADRB1;ADRB2;ADRBK1;AGER;AGRN;AGT;AGTR1;<br>AGTR2;AHR;AKT1;AKT2;ALAS2;ALDH1A2;ALDH1A3;ALDH3A2;ALDH5A1;ALOX15;<br>ALOX15B;AMELX;ANAPC2;ANG;ANGPT1;ANK2;ANXA1;AP3D1;APLN;APLP1;<br>APOA1;APOA2;APOE;APRT;AQP1;AQP2;AR;ARG1;ARG2;ARHGEF15;<br>ARHGEF2;ARID1A…
BP	GO:0003013	Circulatory System Process	1	3.04e-54	3.89e-53	128	4.5	ABAT;ACE;ACE2;ADA;ADIPOQ;ADORA1;ADORA2A;ADORA2B;ADORA3;ADRA1A;<br>ADRA1B;ADRA1D;ADRA2B;ADRB1;ADRB2;ADRB3;ADRBK1;AGT;AGTR1;AGTR2;<br>AGTRAP;ALOX5;ANGPT1;APLN;APOE;ATP1A1;ATP1A2;AVP;AVPR1A;AVPR1B;<br>AVPR2;BDKRB2;CACNA1G;CACNA1H;CALCA;CAMK2D;CARTPT;CAV1;CAV3;CFTR;<br>CHRM2;CHRM3;CNR1;CTNNBIP1;CYBA;CYP11B1;CYP11B2;DBH;DRD2;DRD3;<br>DRD5;EDN1;EDN2;EDNRA;EPHX2;EPO;F2R;F2RL1;FKBP1B;GAA;<br>GSK3A;GUCY1B…
BP	GO:0007165	Signal Transduction	1	2.12e-53	2.5e-52	731	1.6	AARS;ABCA1;ABCC9;ABL1;ACTL6A;ACVR1;ACVR2A;ADA;ADAM17;ADAM8;<br>ADAMTS20;ADAP1;ADAP2;ADCY3;ADCY5;ADCY6;ADH7;ADIPOQ;ADORA1;ADORA2A;<br>ADORA2B;ADORA3;ADRA1A;ADRA1B;ADRA1D;ADRA2A;ADRA2B;ADRA2C;ADRB1;ADRB2;<br>ADRB3;ADRBK1;AGER;AGRN;AGT;AGTR1;AGTR2;AGTRAP;AHR;AKAP13;<br>AKT1;AKT2;ALDH1A1;ALDH1A2;AMELX;ANGPT1;ANK2;ANK3;ANXA1;APLN;<br>APLP1;APOA1;APOE;AR;ARFGEF2;ARHGAP29;ARHGEF15;ARHGEF2;ARID1A;ARNT;<b…
BP	GO:0050877	Neurological System Process	1	7.01e-53	7.6e-52	351	2.2	AARS;ABAT;ACE;ACE2;ACHE;ACSL4;ACTN2;ADCY3;ADCY5;ADCY6;<br>ADIPOQ;ADORA1;ADORA2A;ADRA1A;ADRA1B;ADRA1D;ADRB1;ADRB2;AGRN;AGT;<br>AGTR2;ALDH2;ALDH5A1;ALDH7A1;ALOX5;ANAPC2;AOC2;APOE;ARHGEF15;ARRB2;<br>ASPA;ATP1A2;ATP1A3;ATXN1;AVP;AVPR1A;BAZ1B;BCHE;BDNF;CACNA1A;<br>CACNA1B;CACNA1F;CACNA1G;CACNA2D2;CACNB2;CACNB3;CACNB4;CACNG2;CACNG3;CALB1;<br>CALCA;CALM3;CAMK2A;CAMK2D;CAMK2G;CARTPT;CAV2;CDC20;CDH3;CHAT;…
BP	GO:0030154	Cell Differentiation	1	3.93e-51	3.95e-50	460	1.9	ABCA1;ABCG1;ABHD5;ABL1;ACE;ACHE;ACIN1;ACSL4;ACTA1;ACTG1;<br>ACVR1;ACVR2A;ADA;ADAM17;ADAM8;ADAMTS20;ADAMTS9;ADIPOQ;ADRA2B;ADRA2C;<br>ADRB1;AGER;AGRN;AGT;AGTR1;AKT1;AKT2;ALAS2;ALDH1A2;ALOX15B;<br>AMELX;ANAPC2;ANG;ANGPT1;ANK2;ANXA1;AP3D1;APOE;AR;ARHGEF2;<br>ARNT;ARX;ASCL1;ASPA;ATM;ATOH1;AVPR1A;B4GALT1;BARX1;BAX;<br>BCL11B;BCL2;BCL2L1;BDNF;BGLAP;BLM;BMP2;BMP4;BMP5;BMP6;<br>BNIP3;BRCA1;CA2;CACNA1C;CAC…
BP	GO:0006629	Lipid Metabolic Process	1	9.61e-45	8.47e-44	262	2.4	ABCA1;ABCG1;ABHD5;ACACA;ACACB;ACADSB;ACSL1;ACSL3;ACSL4;ADH4;<br>ADH7;ADIPOQ;ADORA1;ADORA2B;ADRA2A;AGT;AGTR1;AKR1B10;AKR1C1;AKR1C2;<br>AKR1C3;AKR1C4;AKR1D1;AKT1;AKT2;ALDH1A2;ALDH1A3;ALDH3A2;ALDH3B1;ALDH3B2;<br>ALDH5A1;ALDH8A1;ALOX15;ALOX15B;ALOX5;ALOX5AP;ANG;ANXA1;APOA1;APOA2;<br>APOE;ATM;ATP1A1;ATP8B1;AVP;AVPR1A;BAAT;BCL11B;BMP6;BRCA1;<br>CACNA1H;CAV1;CAV3;CBR4;CCL5;CD36;CD74;CDC42;CEBPA;CERS2;<b…
BP	GO:0002376	Immune System Process	1	1e-43	8.32e-43	339	2.1	8-Mar;ABCC9;ACE;ACIN1;ACVR2A;ADA;ADAM17;ADAM8;ADIPOQ;ADK;<br>ADORA1;ADORA2B;ADSS;ADSSL1;AGER;AHR;AKT1;ALAS2;AMICA1;ANGPT1;<br>ANXA1;AP3D1;APLN;APOA1;APOA2;ARG2;ARNT;ARRB2;ASH2L;ASS1;<br>ATM;B4GALT1;BARX1;BCAR1;BCL11B;BCL2;BCL2L1;BGLAP;BLM;BMP4;<br>BMP6;BNIP3;C5;CA2;CALCA;CALCOCO2;CALR;CAMK2A;CAMK2D;CAMK2G;<br>CARTPT;CAV1;CBFA2T3;CCL5;CCND3;CD34;CD36;CD47;CD74;CDC42;<br>CDKN1A;CDKN2A;CEBPA;CEBPB;C…
BP	GO:0040011	Locomotion	1	8.83e-43	6.92e-42	263	2.3	ABL1;ACE;ACE2;ACTG1;ACVR1;ADA;ADAM17;ADAM8;ADIPOQ;ADORA1;<br>ADRA2A;AGER;AGRN;AGT;AGTR1;AGTR2;AIF1;AKT1;AKT2;ALOX15B;<br>AMICA1;ANG;ANGPT1;ANK2;APOA1;APOE;ARRB2;ARX;ASCL1;ATOH1;<br>ATP1A2;B4GALT1;BCAR1;BCL2;BDNF;BMP2;BMP4;BRCA1;C5;CACNA1C;<br>CACNA1D;CACNA1F;CACNA1G;CACNA1H;CACNA1S;CACNB1;CACNB2;CACNB3;CACNB4;CALCA;<br>CAV1;CCL5;CD34;CD47;CD74;CDC42;CDK5R1;CHRM1;CLEC4M;CNTN2;<br>COL1A1;COL5A1;CSF…
BP	GO:0008219	Cell Death	1	2.63e-41	1.77e-40	334	2	AARS;ABL1;ACE;ACIN1;ACTN2;ACTN3;ACVR1;ADA;ADAM17;ADAM8;<br>ADAMTS20;ADIPOQ;ADORA1;ADORA2A;ADRA1A;ADRB1;ADRB2;AGER;AGRN;AGT;<br>AGTR2;AHR;AIF1;AKAP13;AKT1;AKT2;ALDH1A2;ALDH1A3;ALOX15B;ANG;<br>ANGPT1;ANXA1;APIP;APLP1;APOE;AQP1;AQP2;AR;ARG2;ARHGEF2;<br>ARRB2;ASCL1;ASNS;ATM;ATOH1;ATP2A1;ATXN1;AVP;B4GALT1;BAG1;<br>BAX;BCAR1;BCL11B;BCL2;BCL2L1;BDNF;BMP2;BMP4;BNIP3;BRCA1;<br>C5;CACNA1A;CALR;CAT;CAV1;CCL…
BP	GO:0034641	Cellular Nitrogen Compound Metabolic Process	1	1.04e-38	6.4e-38	856	1.4	AARS;AARS2;ABAT;ABCA1;ABCC2;ABCC4;ABCC9;ABCG1;ABL1;ACADSB;<br>ACHE;ACIN1;ACMSD;ACTL6A;ACVR1;ACY1;ADA;ADAM8;ADAP1;ADAP2;<br>ADCY3;ADCY5;ADCY6;ADH1A;ADI1;ADIPOQ;ADK;ADORA1;ADORA2A;ADORA2B;<br>ADORA3;ADRA1D;ADRA2A;ADRB1;ADRB2;ADRB3;ADSS;ADSSL1;AGER;AGRN;<br>AGT;AGTR2;AGXT;AGXT2;AHCYL1;AHR;AIF1;AK9;AKAP13;AKT1;<br>AKT2;ALAD;ALAS1;ALAS2;ALDH1A1;ALDH1L1;ALDH5A1;ALDH7A1;AMPD3;AMT;<br>ANG;AOC2;APEX2;APIP…
BP	GO:0048870	Cell Motility	1	2.76e-37	1.62e-36	196	2.6	ABL1;ACE;ACVR1;ADA;ADAM17;ADAM8;ADIPOQ;ADORA1;ADRA2A;AGER;<br>AGT;AGTR1;AGTR2;AIF1;AKT1;AKT2;ALOX15B;AMICA1;ANG;ANGPT1;<br>APOA1;APOE;ARRB2;ARX;ASCL1;ATOH1;B4GALT1;BCAR1;BCL2;BMP2;<br>BMP4;BRCA1;C5;CALCA;CAV1;CCL5;CD34;CD47;CD74;CDK5R1;<br>CNTN2;COL1A1;COL5A1;CSF1;CSF1R;CTSH;CX3CR1;CXCL13;CXCR1;CXCR4;<br>DAB2IP;DBH;DDR2;DOCK4;DRD1;DRD2;DRD5;EDN1;EDN2;EDNRA;<br>EGFR;ELANE;EPHB1;ESR2;F10;F2;F2R;F2R…
BP	GO:0006520	Cellular Amino Acid Metabolic Process	1	1.27e-30	6.39e-30	124	3	AARS;AARS2;ABAT;ACADSB;ACMSD;ACY1;ADI1;AGXT;ALDH5A1;ALDH7A1;<br>AMT;APIP;ARG1;ARG2;ASNS;ASPA;ASRGL1;ASS1;BAAT;BCAT1;<br>BCAT2;CAD;CCL5;CDO1;CLN3;COMT;CTPS1;DARS;DARS2;DCT;<br>DDC;DHFRL1;DMGDH;DNMT3A;DNMT3B;DPYS;ENOPH1;FOLR1;FPGS;FTCD;<br>G6PD;GAMT;GARS;GATA3;GATM;GCAT;GCSH;GGH;GLDC;GLO1;<br>GLUL;GNMT;GOT1;GOT2;GPT;GPT2;GSS;GSTP1;HAAO;HIBADH;<br>HNF4A;IARS;IARS2;IDO1;INS;KARS;KMO;KYNU;LARS;LARS2;<…
BP	GO:0007568	Aging	1	3.34e-30	1.63e-29	80	4.1	ADA;ADRA1A;ADRB1;ADRB3;ADRBK1;AGT;ALDH3A1;APOE;AQP2;ASS1;<br>ATM;BCL2;BGLAP;CALCA;CALR;CAT;CCL5;CDKN1A;CDKN2A;CNR1;<br>COX1;DBH;DDC;DNAJA3;EDN1;EDNRA;EPO;F3;FADS1;FAS;<br>FOS;FURIN;GRB2;GSS;HCN2;HMGA2;HTR2A;ICAM1;IL1B;IL6;<br>ILK;JUN;KL;LCK;LDLR;LRP2;LRRK2;MAP2K1;MAPK14;MIF;<br>MPO;NCF2;NOS3;NR3C1;P2RY1;PLA2R1;PML;PRKCD;PTEN;PTGS1;<br>RELA;RPS6KB1;RXRA;SERPINE1;SHC1;SIRT1;SLC18A2;SLC32A1;SLC6A3;S…
BP	GO:0040007	Growth	1	4.84e-29	2.27e-28	172	2.4	ACTA1;ACTL6A;ADAM17;ADRA1B;ADRB1;ADRB2;AGRN;AGT;AGTR1;AGTR2;<br>AKT1;ALOX15B;ANAPC2;APOE;AR;ARX;AVP;AVPR1A;BCAR1;BCL2;<br>BCL2L1;BMP2;BMP4;BMP5;BMP6;CACNA2D2;CAMK2D;CAV3;CCNE1;CD36;<br>CDC42;CDKN1A;CDKN2A;CHAT;CNTF;CSF1;CTSG;CYBA;CYP19A1;CYP27B1;<br>DAB2;DDR1;DDX5;DRD2;DRD3;EDN1;ELANE;EP300;ERBB2;ESR1;<br>ESR2;F2;FBP1;FGF10;FGFR2;FHL1;FOXO3;GAS6;GATM;GHRH;<br>GHRL;GLI3;GNAS;GSK3A;HEG1;HIF1A;HMGA2…
BP	GO:0000003	Reproduction	1	3.26e-28	1.44e-27	232	2	ABAT;ACE2;ACSL4;ACVR1;ACVR2A;ADA;ADRBK1;AGT;AHR;ALOX15B;<br>ANG;ANXA1;APLN;APRT;AQP2;AR;ARG1;ARG2;ATM;AVP;<br>AVPR1A;B4GALT1;BCAT2;BCL2;BCL2L1;BMP2;BMP4;BMP5;BMP6;CACNA1H;<br>CAD;CALCA;CALR;CAT;CAV1;CCL5;CCND1;CCNE1;CCNH;CCNT1;<br>CDC25B;CDK7;CDO1;CETN2;CHAT;CHUK;CLEC4M;CNR1;COMT;COX2;<br>CRH;CRHBP;CRHR1;CSF1;CTNNB1;CXCR4;CYP11A1;CYP17A1;CYP19A1;CYP1A1;<br>CYP27B1;DBH;DDR1;DNMT3A;DRD1;DRD5;DYNLL1…
BP	GO:0006464	Cellular Protein Modification Process	1	3.97e-25	1.6e-24	403	1.6	8-Mar;ABCA1;ABL1;ACP1;ACTL6A;ACVR1;ACVR2A;ADAM17;ADAM8;ADCY3;<br>ADCY5;ADCY6;ADIPOQ;ADORA1;ADORA2B;ADRA2A;ADRA2B;ADRA2C;ADRB2;ADRBK1;<br>AGT;AIF1;AKAP13;AKT1;AKT2;ANAPC2;ANG;ANGPT1;ANXA1;APOA1;<br>APOE;ARNT;ARRB1;ARRB2;ASH2L;ASPH;ATM;AURKA;AVP;B4GALT1;<br>BAZ1B;BCL2;BLM;BMP2;BMP4;BMP6;BRCA1;C5;CAD;CALCA;<br>CALR;CAMK2A;CAMK2D;CAMK2G;CARTPT;CAV1;CAV3;CCL5;CCNA2;CCNC;<br>CCND1;CCND3;CCNE1;CCNH;CCNT…
BP	GO:0048646	Anatomical Structure Formation Involved In Morphogenesis	1	3.32e-18	1.2e-17	143	2.1	ACTA1;ACTG1;ACVR1;ADA;ADAM8;ADORA2B;ALDH1A3;ANG;ANGPT1;AQP1;<br>AR;ATM;B4GALT1;BMP2;BMP4;C5;CACNA1H;CACNA1S;CAV3;CCL5;<br>CD36;CDC42;CHRNA7;COL1A1;CRHR2;CTNNB1;CX3CR1;CXCL13;DLL1;DLX5;<br>EDA;EDN1;EDNRA;EP300;EPHB1;ERBB2;F3;FASLG;FGF1;FGF10;<br>FGFR2;FHL2;FKBP1A;FOXO4;GATA3;GHRL;GJA5;GLI3;GRB2;HDAC1;<br>HDAC2;HDAC9;HIF1A;HIPK2;HMGA2;HMOX1;HNF1B;HOXA5;IL1B;IL6;<br>ILK;ISL1;ITGAV;ITGB3;JUN;JUNB;KLF…
BP	GO:0006461	Protein Complex Assembly	1	9.5e-18	3.35e-17	136	2.1	ACACA;ACACB;ACHE;ACTN2;ADIPOQ;ADRB2;AHR;AKR1C1;ALAD;ALDH5A1;<br>ALOX5AP;ANG;ANGPT1;ARG1;BAX;BLM;C1QTNF1;CALR;CALY;CAT;<br>CAV1;CAV2;CAV3;CBR4;CCL5;CD74;CDC42;CHAF1A;CHRNA3;COL1A1;<br>CREBBP;CRP;CRYZ;CSF2;CSNK2B;CTNNBIP1;CXCL13;CYBA;DARS;DLG4;<br>DMTN;DPYS;FAS;FBP1;FER;FGA;FKBP1A;FKBP4;GLRB;GNMT;<br>GRB2;GSK3B;HMGB1;HMOX1;HNF1B;HPRT1;HR;HSP90AA1;HSPA4;HSPD1;<br>IGF1R;ILK;INSR;ITPR3;KCNA5;KCND2;KCN…
BP	GO:0009790	Embryo Development	1	2.69e-16	8.84e-16	154	1.9	ACSL4;ACVR1;ACVR2A;ADA;ADIPOQ;ALDH1A2;ALDH1A3;AR;ARNT;ATM;<br>ATOH1;BCL2L1;BMP2;BMP4;BRCA1;BTF3;C5;CAD;CDK5R1;CEBPA;<br>CEBPB;CHRNA10;COL1A1;CSF2;CTNNB1;CYP1A1;DAB2;DLL1;DLX5;DNAJA3;<br>DNMT3A;DNMT3B;DPPA3;EDN1;EDNRA;EGFR;EPOR;FGF10;FGFR1;FGFR2;<br>FOXA1;FOXL2;FOXO1;FOXO3;FOXO4;FOXP3;GATA3;GATM;GGCX;GJA5;<br>GLI3;GNAS;GRB2;HCN4;HDAC1;HDAC2;HEG1;HIF1A;HIPK2;HMGA2;<br>HNF1B;HNF4A;HOXA5;HTR2B;IL1B;I…
BP	GO:0051186	Cofactor Metabolic Process	1	3.77e-15	1.18e-14	69	2.7	ACACA;ACACB;ACADSB;ACSL1;ACSL3;ACSL4;ADH4;ALAD;ALAS1;ALAS2;<br>ALDH1L1;ASPDH;BAAT;BLVRB;CBR1;CBR3;CIAO1;CYP1A1;DHFRL1;ELOVL4;<br>FECH;FOLR1;FPGS;FTCD;G6PD;GLYAT;GLYR1;GNMT;HAAO;HIBADH;<br>HMGCR;HMOX1;HNF4A;HPX;KMO;KYNU;MCCC1;MCCC2;MDH2;MLYCD;<br>MMAB;MTHFD1;MTHFD2;MTHFR;MTR;NAMPT;NAPRT;NFS1;NOX1;OGDH;<br>PCBD1;PDXK;PGD;PGLS;PIPOX;PNP;QDPR;QPRT;SHMT1;SLC5A6;<br>SNCA;SPR;TALDO1;TKT;TPK1;TSPO;UBIAD1…
BP	GO:0006091	Generation Of Precursor Metabolites And Energy	1	4.43e-15	1.36e-14	99	2.2	ACACA;ACACB;ADCY3;ADCY5;ADCY6;ADIPOQ;ADRA1B;ADRA2A;ADRA2C;ADRB1;<br>ADRB3;AKT1;AKT2;ALDH5A1;ARNT;ATP5E;AVP;AVPR1A;CACNA1A;CACNA1C;<br>CACNA1D;CACNA2D2;CALM3;CEBPA;CHRM3;COX1;COX2;COX3;COX4I1;COX5A;<br>COX5B;COX6A2;COX6B1;COX6C;COX7A1;COX7B;COX7C;COX8A;CYB5A;CYBA;<br>CYBB;FADS1;FADS2;FBP1;FECH;FFAR1;GAA;GNAS;GNMT;GSK3A;<br>GSK3B;HIF1A;HMGB1;IGF1;IGF2;INS;INSR;ITPR1;ITPR2;ITPR3;<br>KCNB1;KCNC2;KCNJ…
BP	GO:0044403	Symbiosis, Encompassing Mutualism Through Parasitism	1	7.35e-15	2.21e-14	39	3.9	ACE2;AQP1;BCL2L1;CD36;CLEC4M;CTSG;CXCR4;ELANE;EP300;F2RL1;<br>HDAC1;HIPK2;HMGA2;HYAL2;ICAM1;IFNG;INSR;ITGAV;JUN;LEF1;<br>LTA;MPO;NCF1;NEDD4;NOD2;REST;RXRA;SMAD3;SMARCA4;SMARCB1;<br>SP1;TAP1;TGFB1;TIRAP;TLR3;TLR4;TLR7;TNF;TYMS;
BP	GO:0022607	Cellular Component Assembly	1	2.06e-14	5.8e-14	218	1.6	ABCA1;ACACA;ACACB;ACHE;ACTA1;ACTG1;ACTN2;ACTN3;ADIPOQ;ADRB2;<br>AGRN;AHR;AIF1;AKR1C1;ALAD;ALDH5A1;ALOX5AP;ANG;ANGPT1;APOA1;<br>APOA2;APOE;ARG1;ARHGEF15;ARRB1;BAX;BCL2;BICD1;BLM;C1QTNF1;<br>CALR;CALY;CAT;CAV1;CAV2;CAV3;CBR4;CCL5;CD47;CD74;<br>CDC42;CDH3;CDH5;CDH8;CDKN2A;CHAF1A;CHRNA3;CHRNB2;COL1A1;CREBBP;<br>CRP;CRYZ;CSF2;CSNK2B;CTNNB1;CTNNBIP1;CXCL13;CYBA;DARS;DLG4;<br>DMTN;DNM3;DPYS;DRD1;DRD2;DY…
BP	GO:0009056	Catabolic Process	1	2.15e-13	5.94e-13	345	1.4	ABAT;ABCA1;ABCC2;ABCC4;ABCC9;ABCG1;ABHD5;ABL1;ACADSB;ACE;<br>ACE2;ACHE;ACIN1;ACMSD;ADA;ADAM8;ADAMTS9;ADAP1;ADAP2;ADCY3;<br>ADCY5;ADCY6;ADH4;ADIPOQ;ADORA1;ADRA1B;ADRA2A;ADRB1;AGXT2;AKAP13;<br>AKR1D1;AKT1;AKT2;ALDH1A1;ALDH1L1;ALDH5A1;ALDH7A1;AMPD3;AMT;ANAPC2;<br>APOA2;APOE;ARFGEF2;ARG1;ARHGAP29;ARHGEF15;ARHGEF2;ARNT;ARRB1;ARRB2;<br>ASPA;ASPDH;ASRGL1;ATAD2;ATM;ATP11C;ATP13A2;ATP1A1;ATP1A2;ATP1A3;<br…
BP	GO:0000902	Cell Morphogenesis	1	5.23e-13	1.42e-12	149	1.8	ABL1;ACHE;ACTG1;ADAM8;AGRN;AMELX;ANAPC2;ANK2;APOE;ARHGEF2;<br>ARX;ATOH1;BCL11B;BCL2;BDNF;BMP2;BMP4;BRCA1;CACNA1C;CACNA1D;<br>CACNA1F;CACNA1G;CACNA1H;CACNA1S;CACNB1;CACNB2;CACNB3;CACNB4;CDC42;CDK5R1;<br>CHRNA3;CHRNB2;CITED1;CNTF;CNTN2;COL1A1;COL5A1;CSF1R;CSNK2A1;CSNK2A2;<br>CSNK2B;CTNNB1;DAB2;DAB2IP;DLG4;DLX5;DRD2;DTNBP1;EGFR;EP300;<br>EPHB1;ERBB2;EZR;F2;FAS;FEZF2;FGFR1;FGFR2;FGR;FOXA1;<br>GATA3;G…
BP	GO:0065003	Macromolecular Complex Assembly	1	5.71e-13	1.52e-12	153	1.8	ABCA1;ACACA;ACACB;ACHE;ACTN2;ADIPOQ;ADRB2;AHR;AKR1C1;ALAD;<br>ALDH5A1;ALOX5AP;ANG;ANGPT1;APOA1;APOA2;APOE;ARG1;BAX;BICD1;<br>BLM;C1QTNF1;CALR;CALY;CAT;CAV1;CAV2;CAV3;CBR4;CCL5;<br>CD74;CDC42;CHAF1A;CHRNA3;COL1A1;CREBBP;CRP;CRYZ;CSF2;CSNK2B;<br>CTNNBIP1;CXCL13;CYBA;DARS;DLG4;DMTN;DPYS;DYNC1H1;EP300;FAS;<br>FBP1;FER;FGA;FKBP1A;FKBP4;GLRB;GNMT;GRB2;GSK3B;HIST2H2AB;<br>HMGB1;HMGB2;HMOX1;HNF1B;HPRT1;H…
BP	GO:0019748	Secondary Metabolic Process	1	1.6e-12	4.11e-12	31	4.1	ADH4;ADH7;ALDH1A2;ALDH1A3;ALDH8A1;BCHE;BCL2;CITED1;CYP1A1;CYP2E1;<br>CYP3A4;DCT;DDC;DHRS3;DHRS9;HSD17B3;LRAT;NAMPT;NAPRT;OCA2;<br>POR;RBP1;RDH10;RDH11;RDH12;RDH8;RETSAT;SRD5A1;TH;TYR;<br>TYRP1;
BP	GO:0021700	Developmental Maturation	1	3.3e-12	8.31e-12	44	3.1	AGRN;ANAPC2;ANG;ARHGEF15;BCL2;BMP2;CDC20;CDC25B;CDH5;CEBPA;<br>CNTN2;CTNNB1;EPO;ESR2;FOXA1;FOXO3;G6PD;HOXA5;IGF1;IRX5;<br>KCNIP2;LEP;LHX6;LRRK2;NEUROD2;NOTCH1;NRXN1;PALM;PAX2;PDE3A;<br>PGR;PPARD;PPARG;PTGS2;PTK2B;RAB3A;RB1;REN;RET;TGFB2;<br>TRPV1;TYMS;WNT10B;XBP1;
BP	GO:0006605	Protein Targeting	1	7.97e-11	1.97e-10	75	2.2	ADORA1;AGT;AGXT;AHCYL1;AKT1;BMP4;CACNB1;CALR;CD36;CDKN1A;<br>CDKN2A;DAB2IP;DRD1;EDA;EGFR;EP300;F2;F2R;FLNA;GABARAP;<br>GLI3;GSK3B;HNF4A;HPS4;HSP90AA1;HSPA4;IFNG;IGF1;IL10;IL1B;<br>IL6;JUN;KPNA2;KPNA3;LEP;LHCGR;MAPK1;MTOR;NCF1;NEDD4;<br>NFKBIA;NLGN1;OPRD1;PALM;PDE2A;PML;POLA2;PPP3CA;PPP3R1;PRKACA;<br>RHOA;RPAIN;SEC61B;SHH;SIRT1;SIX3;SMAD3;SMAD4;SNAI2;STAT3;<br>TGFB1;TGFB2;TLR3;TLR4;TLR7;TLR9;TNF;T…
BP	GO:0006913	Nucleocytoplasmic Transport	1	6.57e-09	1.54e-08	64	2.1	AGT;AHCYL1;AKT1;ATXN1;BMP4;CALR;CD36;CDKN1A;CDKN2A;CITED1;<br>DAB2IP;DRD1;EDA;EGFR;EP300;F2;F2R;FLNA;GLI3;GSK3B;<br>HNF4A;IFNG;IGF1;IL10;IL1B;IL6;JUN;KHDRBS1;KPNA2;KPNA3;<br>LEP;MAPK1;MTOR;NCBP2;NEDD4;NFKBIA;OPRD1;PDE2A;PML;POLA2;<br>PPP1CC;PPP3CA;PPP3R1;PRKACA;RHOA;RPAIN;SEC61B;SHH;SIRT1;SIX3;<br>SMAD3;SMAD4;SNAI2;STAT3;TGFB1;TGFB2;TLR3;TLR4;TLR7;TLR9;<br>TNF;TP53;TSC2;UBR5;
BP	GO:0061024	Membrane Organization	1	1.52e-08	3.52e-08	109	1.7	ABCA1;ABL1;ACHE;ADIPOQ;ADORA1;ADORA2A;ADRB2;AGRN;AKT1;ANGPT1;<br>ANXA1;AP3D1;APLP1;APOE;AR;ARRB1;ARRB2;ATP11C;ATP8B1;BAX;<br>BCL2;BCL2L1;BICD1;BNIP3;CALR;CALY;CAV1;CAV2;CAV3;CD36;<br>CD47;CLEC4M;CLN3;CNTN2;COL5A1;CRP;CXCR4;DAB2;DLG4;DNM3;<br>DRD2;DRD3;DTNBP1;EEA1;EGFR;ELANE;F2RL1;FCGR1A;FGR;FLNA;<br>FOLR1;GRB2;GRIA1;GRIK2;GRIN2B;GRIN3B;HPN;HSP90AA1;HSPA4;HTR1B;<br>HTR2B;ITGAV;KCNIP2;KCNN4;LDLR;LR…
BP	GO:0006259	DNA Metabolic Process	1	1.81e-08	4.11e-08	135	1.6	ABL1;ACHE;ACIN1;ACTL6A;ADIPOQ;ADRA1D;APEX2;ATM;BAX;BAZ1B;<br>BCL11B;BLM;BNIP3;BRCA1;CALR;CCNE1;CCNH;CDC42;CDC45;CDK2;<br>CDK7;CDKN1A;CDKN2A;CETN2;CHAF1A;CHRNA4;CSF2;CUL4B;DNAJA3;DNMT1;<br>DNMT3A;DNMT3B;DUT;EGFR;EPO;FGF10;FOS;FOXL2;FOXP3;GADD45A;<br>GADD45G;GINS2;GINS4;GNAS;GSK3A;GTF2H1;HCRT;HELB;HIST2H2AB;HMGA2;<br>HMGB1;HMGB2;HSPD1;IFNG;IGF1;IGF1R;IL10;IL4;IL6;INS;<br>INSR;ITGB3BP;JUN;KAT5;KITLG…
BP	GO:0007049	Cell Cycle	1	2.57e-07	5.74e-07	189	1.4	ABL1;ACVR1;ADAM17;ADCY3;AHR;AIF1;AKT1;AKT2;ALOX15B;ANAPC2;<br>ANXA1;APEX2;ARHGEF2;ASNS;ATM;AURKA;BCAT1;BCL2;BCL2L1;BLM;<br>BMP2;BMP4;BRCA1;CALR;CAMK2D;CAV2;CCNA2;CCNC;CCND1;CCND3;<br>CCNE1;CCNH;CCNT1;CDC20;CDC25B;CDC42;CDC45;CDK2;CDK5R1;CDK5R2;<br>CDK7;CDK8;CDKN1A;CDKN2A;CETN1;CETN2;CHAF1A;COPS5;CREBBP;CSNK2A2;<br>CTNNB1;CUL4B;CYP1A1;CYP27B1;DDR2;DRD3;DTYMK;DYNC1H1;DYNLL1;EDN1;<br>EGFR;EP300;FGF1…
BP	GO:0043473	Pigmentation	1	1.99e-06	4.25e-06	24	2.8	ADAMTS20;ADAMTS9;AP3D1;BCL2;CITED1;DCT;DRD2;EDA;GLI3;GPR143;<br>HPS4;KIT;KITLG;LEF1;MAP2K1;MC1R;MEF2C;NRXN1;OCA2;SNAI2;<br>SOD2;TH;TYR;TYRP1;
BP	GO:0007009	Plasma Membrane Organization	1	4.06e-06	8.54e-06	17	3.4	ADIPOQ;AGRN;AKT1;AR;BCL2L1;CAV3;COL5A1;CXCR4;NOX1;NRXN1;<br>PALM;PIK3R1;S100A9;SOD1;SORBS1;TGFB2;WNT4;
BP	GO:0051276	Chromosome Organization	1	7.82e-06	1.62e-05	104	1.5	ACIN1;ACTL6A;ARID1A;ARRB1;ASH2L;ATM;BAZ1B;BLM;BNIP3;BRCA1;<br>CDK2;CDKN2A;CHAF1A;CHD1;CHD9;CREBBP;CTNNB1;CTR9;DNMT1;DNMT3A;<br>DNMT3B;EP300;FOXA1;FOXP3;HDAC1;HDAC2;HDAC9;HIST2H2AB;HLCS;HMGA2;<br>HMGB2;HMGN3;IL1B;ITGB3BP;KAT5;KDM5A;KDM6B;KMT2A;KMT2D;LDB1;<br>LEF1;LIG4;MAPK3;MED24;MTA2;MYC;NCOA2;NCOA3;NCOR1;NOS1;<br>NR3C1;NSD1;PADI4;PHB;PML;POLA1;POLA2;PPARGC1A;PRDM2;PRKAA1;<br>PRKAA2;PRKCA;PRKCB;P…
BP	GO:0006790	Sulfur Compound Metabolic Process	1	1.11e-05	2.26e-05	33	2.2	ADI1;ALDH5A1;ANGPT1;APIP;CCL5;CDO1;COMT;CTNNB1;DNMT3A;DNMT3B;<br>ENOPH1;G6PD;GLO1;GNMT;GOT1;GSS;GSTP1;IGF1;MCCC1;MRI1;<br>MTAP;MTHFD1;MTHFR;MTR;MTRR;NFS1;SLC19A2;SLC5A6;SOD1;SOD2;<br>STAT5A;SULT1E1;TPK1;
BP	GO:0007005	Mitochondrion Organization	1	2.83e-05	5.62e-05	37	2	AKT1;ATP2A1;AVP;BAX;BCL2;BCL2L1;BNIP3;CAV2;CDKN2A;CEBPA;<br>DAP3;DARS2;DHODH;DNAJA3;HSP90AA1;HSPA4;IFI6;IGF1;JUN;LONP1;<br>LRRK2;MAP3K1;NOS3;PARK2;PDE2A;PINK1;PPARGC1A;PPARGC1B;RAB3A;SMAD3;<br>SNCA;SOD2;TP53;TSPO;TYMP;YARS2;YWHAZ;
BP	GO:0071941	Nitrogen Cycle Metabolic Process	1	6.1e-05	0.000119	7	5.7	ARG1;ARG2;ASS1;CEBPA;OTC;SLC25A15;SLC25A2;
BP	GO:0016192	Vesicle-Mediated Transport	1	7.06e-05	0.000136	127	1.4	ABCA1;ABCC4;ABL1;ACHE;ACTN2;ADIPOQ;ADORA1;ADORA2A;ADORA2B;ADRA2A;<br>ADRB2;ANGPT1;ANXA1;AP3D1;APLP1;APOA1;APOE;ARFGEF2;ARRB1;ARRB2;<br>B4GALT1;BICD1;CACNA1H;CALM3;CALR;CALY;CAV1;CAV2;CAV3;CD36;<br>CD47;CD63;CLEC4M;CLN3;CNTN2;CPLX2;CRHR1;CRP;CTNNB1;DAB2;<br>DDC;DNM3;DRD2;DRD3;DTNBP1;EEA1;ELANE;F2RL1;FCGR1A;FGA;<br>FGR;FLNA;FOLR1;GABARAPL2;GAS6;GLRA1;GLRB;GRB2;GRIA1;HMOX1;<br>HPN;HSPA5;HTR1B;HTR2B;…
BP	GO:0007010	Cytoskeleton Organization	1	0.000355	0.000659	98	1.4	ABL1;ACTA1;ACTG1;ADRA2A;AIF1;ANG;APOE;AQP1;AQP2;ARHGEF15;<br>ARHGEF2;ARRB1;AURKA;BAX;BCAR1;BCL2;BICD1;BRCA1;CALR;CAV1;<br>CAV3;CDC42;CDK2;CDK5R1;CETN2;CNTN2;CRIPAK;CSF1R;CTNNB1;DIAPH3;<br>DMTN;DTNBP1;DYNC1H1;DYNLL1;EDN1;EP300;EZR;F2RL1;FER;FGF10;<br>FKBP4;FLNA;FTCD;GABARAP;GADD45A;GHRL;HTT;ILK;KISS1;MAP3K1;<br>MTOR;NCK1;NCK2;NCKAP1L;NCOR1;NEFH;NEFL;PAK1;PAK6;PALM;<br>PARK2;PAWR;PDGFA;PDGFB;PDGFRA…
BP	GO:0034330	Cell Junction Organization	1	0.00143	0.00253	31	1.7	ACTG1;ACTN2;ACTN3;BCL2;CD47;CDC42;CDH3;CDH5;CDH8;CSF1R;<br>CTNNB1;FLNA;GJA5;GRB2;HEG1;HNF4A;ILK;LAMA3;PTEN;PTK2B;<br>PTPN6;ROCK1;ROCK2;SDC4;SMAD3;SORBS1;SRC;STRN;TGFB1;TGFB2;<br>WNT11;
BP	GO:0051604	Protein Maturation	1	0.00183	0.00318	19	2	ADAM8;ASRGL1;CALR;CLN3;CNTN2;F12;F3;FKBP1A;FKBP1B;FURIN;<br>GLI3;HSPD1;NGF;PCSK6;PRSS12;REN;SERPINE1;SHH;STUB1;
BP	GO:0005975	Carbohydrate Metabolic Process	1	0.00231	0.00398	90	1.3	ADIPOQ;ADRA1B;ADRB1;ADRB3;AKT1;AKT2;ALDH1B1;ALDH2;ALDH5A1;ANGPT1;<br>ARNT;B4GALT1;CALM3;CALR;DHDH;FBP1;FOXO1;G6PD;GAA;GAL3ST1;<br>GALNT6;GBA;GBA2;GDPGP1;GHRL;GLO1;GLYR1;GNMT;GOT1;GOT2;<br>GPT;GSK3A;GSK3B;HIBADH;HIF1A;HMGB1;HNF4A;HYAL2;IDNK;IFNG;<br>IGF1;IGF2;IL6;IMPA1;IMPA2;INS;INSR;KCNJ11;KL;LCT;<br>LEP;LRP2;MAS1;MDH2;MTOR;NCOR1;NR3C1;OGDH;P2RY1;PC;<br>PCK1;PGD;PGLS;PHKG2;PIK3CA;PPARA;PPARD;PPAR…
BP	GO:0007155	Cell Adhesion	1	0.004	0.00672	115	1.3	ABL1;ACHE;ACTN2;ACTN3;ADA;ADAM17;ADAM8;ADIPOQ;AGT;AMELX;<br>AMICA1;ANGPT1;AOC3;APLP1;B4GALT1;BCAR1;BCL2;BGLAP;BRCA1;CALCA;<br>CCL5;CD34;CD36;CD47;CDC42;CDH3;CDH5;CDH8;CDK5R1;CDKN2A;<br>CLDN5;CLEC4M;CNTN2;CNTNAP4;COL1A1;COL5A1;CSF1;CTNNB1;CX3CR1;CXCL13;<br>DDR1;DDR2;DLL1;EDA;EGFR;EPHB1;ERBB2;EZR;FER;FGF1;<br>FOXA1;GSK3B;ICAM1;IFNG;IL1B;IL1RN;ILK;ITGAL;ITGAV;ITGB2;<br>ITGB3;ITGB3BP;KITLG;LAMA3;LDB1…
BP	GO:0030198	Extracellular Matrix Organization	1	0.00434	0.0072	22	1.8	ADAMTS20;AGT;B4GALT1;COL1A1;COL5A1;DDR2;FBLN1;FKBP1A;ILK;LGALS3;<br>MYF5;NFKB2;NOX1;NOXO1;P4HA1;PDGFRA;SMARCA4;SOX9;TGFB2;TNF;<br>TNR;WT1;
BP	GO:0034655	Nucleobase-Containing Compound Catabolic Process	1	0.00568	0.00932	145	1.2	ABCA1;ABCC2;ABCC4;ABCC9;ABCG1;ACIN1;ADA;ADAP1;ADAP2;ADCY3;<br>ADCY5;ADCY6;AGXT2;AKAP13;ALDH1A1;AMPD3;ARFGEF2;ARHGAP29;ARHGEF15;ARHGEF2;<br>ARRB1;ASPDH;ATAD2;ATP11C;ATP13A2;ATP1A1;ATP1A2;ATP1A3;ATP2A1;ATP2B4;<br>ATP4A;ATP5E;ATP8A2;ATP8B1;BLM;CAT;CCNH;CDC42;CDK7;CECR1;<br>CETN1;CETN2;CFTR;CHD1;CHRM4;CXCL13;DAB2IP;DDX17;DDX5;DDX52;<br>DDX54;DGKI;DNAJA3;DNM3;DOCK4;DOCK5;DPYD;DPYS;DYNC1H1;FFAR1;<br>FG…
BP	GO:0051301	Cell Division	1	0.0339	0.0488	55	1.3	ANAPC2;ARHGEF2;AURKA;BCAR1;BLM;CALM3;CAT;CCNA2;CCND1;CCND3;<br>CCNE1;CCNT1;CDC20;CDC25B;CDC42;CDK2;CDK7;CDKN2A;CETN1;CETN2;<br>DCT;DPPA3;FGF1;FGFR2;GNAI1;HMGA2;HTR2B;IGF1R;IGF2;IL1B;<br>LEF1;LIG4;NKX3-1;NOTCH1;PDGFA;PDGFB;PDXP;PIK3CB;PPP1CA;PPP1CC;<br>RAB11FIP3;RB1;RHOA;ROCK1;ROCK2;SIRT2;TAL1;TGFB1;TGFB2;TOP1;<br>TUBA1B;TUBB;UBE2I;YBX1;ZBTB16;
BP	GO:0030705	Cytoskeleton-Dependent Intracellular Transport	1	0.0372	0.053	8	2	BICD1;HTT;KIF1A;MAP2K1;NEFL;TUBA1B;TUBB;UCHL1;
BP	GO:0006399	TRNA Metabolic Process	1	0.0448	0.0619	20	1.5	AARS;AARS2;DARS;DARS2;GARS;IARS;IARS2;KARS;LARS;LARS2;<br>LCMT2;MTFMT;NARS;NARS2;TRDMT1;VARS;WARS;WARS2;YARS;YARS2;<br>

## Sheet: enrichmentAnalysis-TTD
Category	Annotation Term ID	Term description	ClusterNum	cluster1(p-value	benjamini-value	coverage	EnrichRatio	gene names)
TTD	2	Analgesics	1	2.12e-17	6.61e-16	57	2.7	ADK;ADORA1;ADORA2A;BDKRB2;CACNA1A;CACNA1B;CACNA1G;CACNA1H;CACNA2D1;CACNA2D2;<br>CACNG1;CHRFAM7A;CHRM2;CHRM4;CHRNA10;CHRNA4;CHRNA5;CHRNA7;CHRNA9;CHRNB2;<br>CHUK;CNR1;CNR2;DLG4;F2R;GRIN1;GRIN2A;GRIN2B;IKBKB;IKBKE;<br>KCND3;KCNJ10;KCNQ2;KCNQ3;NGFR;NTRK1;NTSR1;OPRD1;OPRK1;OPRL1;<br>OPRM1;P2RX3;PTGER1;PTGIR;PTGS2;SCN11A;SCN1A;SCN3A;SCN4A;SCN5A;<br>SCN9A;SCNN1A;TACR2;TRPA1;TRPM8;TRPV1;TRPV3;
TTD	13	Schizophrenia	1	7.61e-11	2.27e-09	17	3.9	BCHE;CHRFAM7A;CHRM1;CHRM5;CHRNA7;DRD2;DRD3;GRIA1;HRH3;HSPD1;<br>HTR2A;HTR2C;HTR5A;HTR6;NOS1;NOS3;SLC6A4;
TTD	5	Hypertension	1	1.86e-10	5.32e-09	27	3	ACE;ADRA1D;ADRA2A;ADRA2B;ADRB1;ADRB2;ADRB3;ADRBK1;AGTR1;AGTR2;<br>AVPR1A;BDKRB2;CACNA1G;CACNA2D1;CACNG1;CYBB;EDNRA;EPHX2;ITPR1;ITPR2;<br>ITPR3;NCF1;OPRL1;REN;SLC12A1;SLC12A2;SLC12A6;
TTD	9	Pain, Unspecified	1	4.28e-09	1.18e-07	20	3.2	ADK;CACNA1A;CHRM2;CHRM4;CHRNB2;CHUK;CNR1;CNR2;F2R;IKBKB;<br>IKBKE;NTRK1;OPRD1;OPRK1;OPRL1;OPRM1;P2RX3;PTGS2;SCN11A;SCNN1A;<br>
TTD	12	Depression	1	4.73e-08	1.25e-06	18	3.2	ADORA2A;ADORA3;ADRB2;CRHR1;DRD2;GLRA1;HTR1A;HTR2A;HTR5A;IDO1;<br>MAOA;NR1I2;NTSR1;OPRL1;SCNN1A;SLC52A2;SLC6A2;TACR2;
TTD	4	Cardiovascular Disease, Unspecified	1	1.67e-06	4.24e-05	29	2.2	ABCA1;ACE2;ADRB1;AGTR1;BDKRB2;CACNA1B;CACNA1G;CCNA2;CDK2;CES1;<br>CYBB;EDN1;EDNRA;EPHX2;ESR1;ESR2;F10;HMGCR;HMOX1;MTTP;<br>NCF1;NOS3;P2RY12;PDE1A;PDE1B;PDE1C;PTGS1;RELA;UTS2;
TTD	26	Migraine	1	2.74e-06	6.73e-05	11	3.6	CACNA1A;CACNA1H;CNR1;HTR1B;HTR1D;HTR1F;HTR2A;HTR2B;HTR7;KCND3;<br>RELA;
TTD	14	Pain	1	9.53e-06	0.000226	17	2.6	ADORA1;ADORA2A;CACNA1H;CACNA2D2;CHRFAM7A;CHRNA4;CHRNA7;KCND3;KCNJ10;KCNQ2;<br>KCNQ3;SCN1A;SCN4A;SCN5A;SCN9A;TRPA1;TRPM8;
TTD	27	Erectile Dysfunction	1	9.95e-06	0.000228	10	3.5	ADRB3;ARG2;CALY;DRD2;OPRL1;PDE1A;PDE1B;PDE1C;PDE2A;PDE5A;<br>
TTD	33	Cardiac Arrhythmias	1	1.82e-05	0.000404	8	3.9	ADORA1;ADRB1;ADRB2;ADRB3;HTR4;KCNH2;KCNJ10;KCNQ1;
TTD	39	Congestive Heart Failure	1	7.17e-05	0.00154	7	3.9	ADRBK1;AVPR1A;AVPR2;EDN1;SLC12A1;TNF;UTS2R;
TTD	22	Anxiety Disorder, Unspecified	1	8.6e-05	0.00179	14	2.6	ADRB1;ADRB2;BCAT1;BCAT2;DRD2;GABRA2;GABRA3;HRH1;HTR1A;HTR1B;<br>HTR2A;HTR2B;NR1I2;OPRL1;
TTD	3	Breast Cancer	1	0.000231	0.00466	30	1.8	AKT1;AKT2;CCND1;COPS5;CSNK2A1;CXCR4;CYP19A1;DNMT3B;EGFR;ESR1;<br>ESR2;ESRRA;FNTA;FOS;HSP90AA1;LHCGR;MAP2K1;MAP2K5;MDM2;NCOA3;<br>NRG1;PGR;PTGS2;RELA;SRC;TOP1;TSPO;TYMP;TYMS;VDR;<br>
TTD	18	Neurodegenerative Diseases	1	0.000272	0.00523	15	2.3	ADORA2A;CHRNA4;CHRNB2;CYP19A1;ESR1;ESR2;HSD11B1;MAPK1;MAPK3;NGFR;<br>NTRK1;OPRK1;PPID;SLC18A2;TSPO;
TTD	16	Parkinson'S Disease	1	0.000276	0.00523	17	2.2	ACHE;ADORA2A;AGTR1;AKT1;AKT2;CHRNB2;COMT;DDC;DRD1;DRD2;<br>DRD4;GRIN2B;LDLR;MAOB;OPRD1;SLC6A3;UCHL1;
TTD	47	Neuropsychiatric Disorders	1	0.000282	0.00523	6	3.9	ADORA2A;ADRA2C;CHRFAM7A;CHRNA7;HTR7;SIGMAR1;
TTD	38	Cocaine Dependence	1	0.000446	0.00807	7	3.4	CALY;DRD2;HTR1A;HTR2A;HTR2C;NR3C1;SLC18A2;
TTD	24	Heart Failure	1	0.000463	0.00815	13	2.4	ACE;ADRA2A;ADRA2B;ADRBK1;AGTR1;ATP1A1;ATP1A2;AVP;CACNA1G;GUCY1B3;<br>PIK3CG;PLN;TNF;
TTD	35	Drug Dependence	1	0.000493	0.00846	8	3.1	CHRFAM7A;CHRNA4;CHRNA7;CHRNB2;DRD3;HTR4;NR3C1;OPRL1;
TTD	8	Asthma	1	0.000513	0.00859	25	1.8	ADORA1;ADORA2B;ADRB1;ADRB2;ALOX5AP;BDKRB2;CXCR1;ELANE;HRH4;ICAM1;<br>IL13;IL4;PDE4A;PDE4B;PDE4C;PDE4D;PDXK;PLCB1;PPARG;PTGDR2;<br>ROCK1;SERPINE1;SYK;TACR2;TNF;
TTD	6	Prostate Cancer	1	0.00054	0.00884	26	1.8	ALOX15;ALOX15B;AR;CYP17A1;HPN;HSP90AA1;LHCGR;MAP2K1;MCL1;NCOA4;<br>NFKB2;NSD1;NTRK1;NTSR1;PRKCA;PTGS2;RELA;RXRA;SLC7A1;SRD5A1;<br>SRD5A2;SVIL;TGFB1;TMBIM6;TP53;VDR;
TTD	53	Benign Prostate Hyperplasia	1	0.0011	0.0172	5	3.9	ADRA1A;CYP17A1;LHCGR;SRD5A1;SRD5A2;
TTD	66	Brain Injury	1	0.0011	0.0172	5	3.9	ADORA2A;ESR1;GABRG2;GSK3B;NR3C2;
TTD	29	Vascular Disease	1	0.00118	0.018	9	2.7	ACE;ALOX15;ALOX15B;F2R;HMOX1;KCNA5;PDE3A;PDE5A;ROCK1;
TTD	10	Alzheimer'S Disease	1	0.00218	0.0326	19	1.8	ACHE;APOE;BCHE;BDKRB2;CES1;CHRFAM7A;CHRM1;CHRM2;CHRNA4;CHRNA7;<br>CHRNB2;GSK3B;HRH3;HTR4;KYNU;MAPK14;MPO;NGFR;PTGS2;
TTD	15	Atherosclerosis	1	0.00276	0.0403	17	1.9	ALOX15;ALOX15B;CAV1;CES1;CYBB;F3;HMGCR;HMOX1;MPO;MTTP;<br>NCF1;NR1H2;NR1H3;PLA2G2A;PPARD;PPARG;RELA;
TTD	57	Osteosarcoma	1	0.00522	0.0731	5	3.2	MDM2;PDE4A;PDE4B;PDE4C;PDE4D;
TTD	60	Chronic Obstructive Pulmonary Disease	1	0.00522	0.0731	5	3.2	PDE4A;PDE4B;PDE4C;PDE4D;PTGDR2;
TTD	28	Epilepsy	1	0.00646	0.0888	10	2.2	ABAT;ADK;CACNA1G;HRH1;KCNQ2;KCNQ3;LEP;NPY5R;OPRL1;SCN11A;<br>
TTD	54	Cerebral Ischemia	1	0.0144	0.164	5	2.8	BCAT1;BCAT2;CACNA1A;CACNA1B;OPRL1;
TTD	56	Ulcerative Colitis	1	0.0144	0.164	5	2.8	HMOX1;MIF;NPR2;PPARG;PTGER4;
TTD	59	Restenosis	1	0.0144	0.164	5	2.8	BDKRB2;HEXIM1;MYC;RELA;ROCK1;
TTD	62	Diabetes Mellitus Type 2	1	0.0144	0.164	5	2.8	FBP1;GAA;HSD11B1;PYGM;SIRT1;
TTD	63	Insomnia	1	0.0144	0.164	5	2.8	GABRA1;GABRB2;MTNR1A;MTNR1B;SLC52A2;
TTD	68	Respiratory Diseases	1	0.0144	0.164	5	2.8	CALY;DRD2;DRD3;DRD4;DRD5;
TTD	69	Renal Diseases	1	0.0144	0.164	5	2.8	ADORA2A;AVPR1A;AVPR2;EPHX2;LRP2;
TTD	98	Thyrotoxicosis [Hyperthyroidism]	1	0.0169	0.164	3	3.9	THRA;THRB;TPO;
TTD	108	Dysmenorrhea, Unspecified	1	0.0169	0.164	3	3.9	AVPR1A;PTGFR;PTGS2;
TTD	111	Endometriosis	1	0.0169	0.164	3	3.9	CYP19A1;LHCGR;PTGS2;
TTD	112	Urinary Incontinence	1	0.0169	0.164	3	3.9	HTR1A;TACR2;TRPV1;
TTD	115	Heart Transplant	1	0.0169	0.164	3	3.9	CACNA1C;CACNA2D1;CACNG1;
TTD	120	Atrial Fibrillation And Flutter	1	0.0169	0.164	3	3.9	ATP1A1;ATP1A2;F10;
TTD	121	Dyspnea	1	0.0169	0.164	3	3.9	OPRD1;OPRK1;OPRM1;
TTD	126	Anemia, Unspecified	1	0.0169	0.164	3	3.9	EPOR;KCNMA1;KCNN4;
TTD	142	Malignant Hyperthermia	1	0.0169	0.164	3	3.9	RYR1;RYR2;RYR3;
TTD	144	Stress-Related Disorders	1	0.0169	0.164	3	3.9	AVPR1B;CRHR1;CRHR2;
TTD	71	Coagulative Disorders	1	0.0172	0.164	4	3.1	F10;F2;F7;SERPINE1;
TTD	82	Thrombotic Disease	1	0.0172	0.164	4	3.1	F10;F2;F3;SERPINE1;
TTD	88	Chronic Myeloid Leukemia	1	0.0172	0.164	4	3.1	ADA;HMOX1;PDE3A;RELA;
TTD	93	Cachexia	1	0.0172	0.164	4	3.1	GHRL;IL6;MSTN;RELA;
TTD	31	Inflammatory Bowel Disease	1	0.02	0.186	8	2.1	ADAM17;ADK;ADORA1;ADORA3;CNR1;P2RX3;PPARG;RELA;
TTD	32	Thrombosis	1	0.02	0.186	8	2.1	F10;F2;F9;MAPK14;P2RY1;P2RY12;RELA;THBD;
TTD	43	Glaucoma	1	0.0223	0.204	6	2.3	ADRB1;ADRB2;AVPR2;CA2;PTGFR;ROCK1;
TTD	34	Stroke	1	0.0312	0.282	8	1.9	AKT1;AKT2;BCAT1;BCAT2;GRIN2B;PTGS2;SCNN1A;SELP;
TTD	44	Neuropathic Pain	1	0.0386	0.3	6	2.1	CACNA1B;CACNA1G;CHRNA10;CHRNA9;NGFR;OPRL1;
TTD	51	Myocardial Infarction	1	0.0386	0.3	6	2.1	BDKRB2;HMGCR;NPR2;PIK3CG;PTGS2;UTS2R;
TTD	72	Nausea And Vomiting	1	0.0411	0.3	4	2.6	DRD2;HRH1;HTR3A;HTR6;
TTD	75	Cognitive Deficits	1	0.0411	0.3	4	2.6	ACHE;CHRM1;DRD2;GABRA5;
TTD	77	Chronic Obstructive Pulmonary Disease, Unspecified	1	0.0411	0.3	4	2.6	ACE;ADRB2;CHRM2;ELANE;
TTD	79	Psychiatric Illness	1	0.0411	0.3	4	2.6	DRD2;DRD3;DRD4;HTR4;
TTD	85	Huntington'S Disease	1	0.0411	0.3	4	2.6	ABAT;AKT1;AKT2;KYNU;
TTD	87	Dementia	1	0.0411	0.3	4	2.6	GABRA5;GRIN2B;HTR4;TSPO;
TTD	90	Brain Tumors	1	0.0411	0.3	4	2.6	APOE;ITGAV;TOP1;TSPO;
TTD	17	Solid Tumors	1	0.0421	0.3	15	1.5	AKT1;AKT2;AURKA;CDK2;CDK7;FGFR1;FNTA;HSP90AA1;NFKB2;PIK3CG;<br>PTPN6;RPS6KB1;SGK1;VDAC2;VDAC3;
